1  
2  
3  
4  
5  
6  
7  
8  
9  
10  
11  
12  
13  
14  
15  
16  
17  
18  
19  
20  
21  
22  
23  
24  
25  
26  
27  
28  
29  
30  
31  
32  
33  
34  
35  
36  
37  
38  
39  
40  
41  
42

**The *Pseudomonas aeruginosa* accessory genome elements, including bacterial immune systems, influence virulence towards *Caenorhabditis elegans***

**Alejandro Vasquez-Rifo<sup>1\*</sup>, Isana Veksler-Lublinsky<sup>2\*</sup>, Zhenyu Cheng<sup>3</sup>, Frederick M. Ausubel<sup>4</sup>, Victor Ambros<sup>1</sup>**

<sup>1</sup>Program in Molecular Medicine, University of Massachusetts Medical School, Worcester, Massachusetts, 01605, USA

<sup>2</sup>Department of Software and Information Systems Engineering, Ben-Gurion University of the Negev, Beer-Sheva, Israel

<sup>3</sup>Department of Microbiology & Immunology, Dalhousie University, Halifax, Nova Scotia, Canada

<sup>4</sup>Department of Molecular Biology, Massachusetts General Hospital, Boston, MA 02114 and Department of Genetics, Harvard Medical School, Boston, MA 02115

\* Equal contribution

Corresponding author: Victor Ambros

Keywords: *C. elegans*, *P. aeruginosa*, accessory genome, virulence, CRISPR-Cas

**ABSTRACT**

Multicellular animals and bacteria frequently engage in predator-prey and host-pathogen interactions, such as the well-studied relationship between *Pseudomonas aeruginosa* and the nematode *Caenorhabditis elegans*. This study investigates the genomic and genetic basis of bacterial-driven variability in *P. aeruginosa* virulence towards *C. elegans*. Natural isolates of *P. aeruginosa* that exhibit diverse genomes display a broad range of virulence towards *C. elegans*. Using gene association and genetic analysis, we identified accessory genome elements that correlate with virulence, including both known and novel virulence determinants. Bacterial immune systems, which shape the accessory genome by filtering horizontal gene transfer, exhibit a predominantly neutral relationship with virulence, with the exception of active CRISPR-Cas systems, which are enriched among high virulence strains. Although CRISPR-Cas does not directly modulate virulence, particular spacer-targeted genes can directly modulate virulence, suggesting a positive, albeit indirect, role for CRISPR-Cas in the evolution of bacterial genome compositions conducive to virulence.

## 43 INTRODUCTION

44

45 Interactions between environmental bacteria and small invertebrate animals, such as free-  
46 living nematodes, are ecologically significant in many terrestrial ecosystems (Ferris, 2010). These  
47 interactions comprise many types of ecological relationships that range from reciprocal harm to  
48 mutualism. Frequently, animal-bacterial interactions are 'predator-prey' relationships, where for  
49 example nematodes feed on bacteria. Such predation can in turn drive the evolution of bacterial  
50 anti-predator mechanisms, such as the production of noxious toxins, and/or full pathogenic  
51 potential where the bacterium can kill and feed on the predator ((Weitere et al., 2005); reviewed  
52 in (Jousset, 2012)). One such bacterial species is *Pseudomonas aeruginosa* (*P. aeruginosa*), that  
53 is preyed upon by invertebrates and is also a facultative pathogen of a broad range of hosts  
54 including plants, amoeboid protists, insects, mammals, and nematodes (Mahajan-Miklos et al.,  
55 1999; Pukatzki et al., 2002; Rahme et al., 1995, 1997).

56 The relationship between a facultatively pathogenic bacterium and a predator, such as a  
57 free-living nematode, can be bidirectional, with the pathogen either serving as a food source for  
58 the predator, or itself thriving on the infected predator. For example, the nematode  
59 *Caenorhabditis elegans* (*C. elegans*) (Weitere et al., 2005) can grow from larval stages to the  
60 adult by feeding on the pathogenic bacterium *P. aeruginosa*. Interestingly, although *C. elegans*  
61 larval development can proceed successfully on *P. aeruginosa*, adults can suffer dramatically  
62 reduced lifetimes, depending on the *P. aeruginosa* strain (for example, median adult survival of  
63 ~2 days on strain PA14 compared to ~14 days on *Escherichia coli* strain OP50 that is used as  
64 standard diet). This mutually-antagonistic relationship between *C. elegans* and *P. aeruginosa* is a  
65 well-studied model for ecologically coexisting predators of *P. aeruginosa* that are also natural  
66 hosts for infection (Tan et al., 1999).

67 It is plausible that *C. elegans* and *P. aeruginosa* interact in natural niches, as the bacterium  
68 is known to inhabit many environments including soils (Deredjian et al., 2014; Kaszab et al.,  
69 2011; Rutherford et al., 2018) and the nematode is often an inhabitant of soil and rotting plant  
70 matter (Schulenburg and Félix, 2017). These interactions could be transitory in the wild, due to  
71 worm avoidance of *P. aeruginosa* or death of the worms, and thus difficult to catalog, but have  
72 been sustained by a report of natural coexistence of the two species (Grewal PS 1991, reviewed in  
73 (Schulenburg and Félix, 2017)).

74 In the present work, we addressed the sources and genomic correlates of variability in the  
75 virulence of distinct *P. aeruginosa* strains towards *C. elegans*. A previous study of 20 *P.*  
76 *aeruginosa* natural isolates revealed strain-driven variation in *P. aeruginosa* virulence,  
77 highlighting virulence as a complex trait, likely the result of multiple components acting in a  
78 combinatorial manner (Lee et al., 2006). Extending this previous work, we conducted an in-depth  
79 genome-wide comparative survey of a set of 52 *P. aeruginosa* strains. We used comparative  
80 genomic approaches to identify correlations between *P. aeruginosa* virulence and the  
81 presence/absence of specific accessory genome elements, including bacterial immune defense  
82 systems.

83 Our analysis revealed gene sets in the accessory genome of *P. aeruginosa* (i.e. the set of  
84 genes present in some, but not all, of the strains in the species) that correlate either with high or  
85 low virulence. Our approach identified known virulence factors, as well as novel factors that can  
86 directly modulate bacterial virulence, either positively or negatively. We also identified genes that  
87 may indirectly affect virulence. For example, our study revealed a positive role in virulence for  
88 certain bacterial immune defense systems which filter horizontal gene transfer (HGT), and hence  
89 can impact the composition of the accessory genome. In particular, we found that *P. aeruginosa*  
90 strains with active CRISPR-Cas systems have statistically higher levels of virulence towards *C.*  
91 *elegans* and that spacer-targeted genes are among the genes associated with lower virulence.  
92 These correlative findings, together with our genetic confirmation of virulence-inhibitory activity  
93 of certain accessory genome elements, support an indirect role for CRISPR-Cas systems in  
94 contributing to the maintenance and evolution of high virulence against nematodes.

95

## 96 RESULTS

97

### 98 **A large *P. aeruginosa* accessory genome underlies substantial strain diversity in gene** 99 **content.**

100 To assess the extent of variation in genetic makeup among a diverse panel of  
101 environmental and clinical *P. aeruginosa* strains, we analyzed *in silico* the genomes of 1488 *P.*  
102 *aeruginosa* strains. The protein-coding genes of the strains were assigned to clusters of  
103 homologous genes using the CD-HIT program (Fu et al., 2012) with a threshold of 70% amino  
104 acid similarity. The clustering procedure resulted in the identification of 28,793 distinct gene  
105 clusters (i.e. groups of homologous genes). We then examined the distribution and frequency of  
106 these 28,793 genes across the 1,488 *P. aeruginosa* strains. 5,170 genes were present in more than  
107 90% of the isolates and were accordingly defined as constituting the *P. aeruginosa* core genome  
108 (Figure 1A). The remaining 23,623 genes constitute the accessory genome of these 1,488 *P.*  
109 *aeruginosa* strains. The frequency distribution of the genes is bimodal, with prominent maxima  
110 corresponding to the core genome and the set of genes that occur only once in these strains  
111 (referred to as ‘singletons’, Figure 1B). The ratio between the pangenome and the core genome  
112 (5.6) agrees with a previously reported ratio: 5.3 (van Belkum et al., 2015), confirming that *P.*  
113 *aeruginosa* harbors a large amount of strain-specific variation in protein-coding genes.

114 To model the phylogenetic relationships between the *P. aeruginosa* isolates, we aligned  
115 the core genomes and used the alignments to build a phylogenetic tree (Figure 1C). The isolation  
116 source of the strains, when available, was categorized as clinical or environmental and this  
117 designation was mapped to the tree (Figure 1C). Environmental strains distribute widely across  
118 the tree and do not associate with any clade in particular. The result is consistent with other  
119 studies that showed that both clinical and environmental isolates of *P. aeruginosa* can originate  
120 from the same clade (Kidd et al., 2012; Pirnay et al., 2005, 2009; Selezska et al., 2012).

121 In order to experimentally study the effect of bacterial genetic variation on the interaction  
122 between *P. aeruginosa* and *C. elegans*, we assembled a collection of 52 representative *P.*

123 *aeruginosa* strains (Supplemental Table 1) selected from the collection of 1,488. The collection  
124 consists of bacterial isolates derived from clinical (85%, mostly from primary infections) and  
125 environmental (15%) settings. The 52 strains distributed widely across *P. aeruginosa* phylogeny,  
126  
127

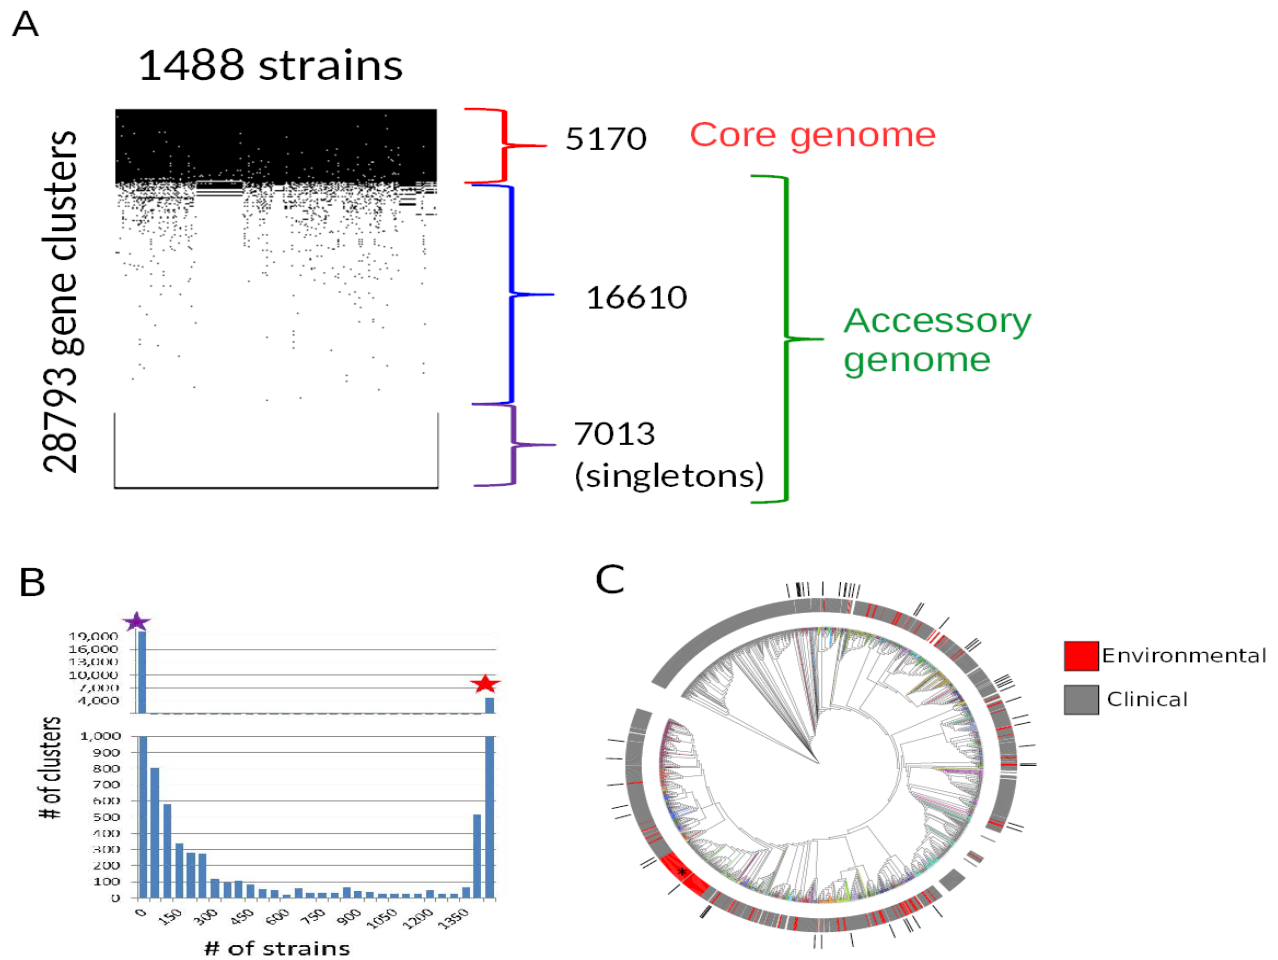

128  
129

### Figure 1 Pangenomic and phylogenetic features of *Pseudomonas aeruginosa*

A) Presence/Absence matrix of *P. aeruginosa* genes across the strains. Core and accessory genomes are marked. B) The frequency distribution of the genes among the 1488 strains. The right end of the distribution, marked with red \*, corresponds to the core genome, while the left end of the distribution, corresponds to singletons and rare accessory genes. C) Phylogenetic tree of *P. aeruginosa* strains. Phylogenetically related MLST groups are shown in different colors. Isolation source is shown on top of the tree. An apparent clade enriched for environmental strains (indicated by \*) is artificially enlarged by the repeated presence of a set of almost identical genomes in the set used to build the phylogeny. The phylogenetic locations of the 52 isolates experimentally tested in this study are indicated in the outer circle (black bars).

130 with no particular bias towards any specific clade (Figure 1C). The 52-strain cohort have a  
131 pangenome of 11,731 genes and an accessory genome of 6,537 genes.

132  
133 **Virulence towards the nematode *C. elegans* strongly varies among *P. aeruginosa* strains**

134 To assess phenotypic variation in interactions of *P. aeruginosa* with *C. elegans*, we  
135 measured the virulence towards *C. elegans* wildtype worms for the collection of 52 *P. aeruginosa*  
136 strains. Young adult *C. elegans* hermaphrodites were exposed to a full lawn of each *P. aeruginosa*  
137 strain using so-called slow kill (SK) media (Tan et al., 1999). These assay conditions minimize  
138 the effects of worm behavior on survival (Martin et al., 2017; Reddy et al., 2009) and promote  
139 bacterial colonization of the worm gut (Tan et al., 1999). Adult lifetime was scored using a semi-  
140 automated method (Stroustrup et al., 2013) to obtain survival curves for worms exposed to each  
141 bacterial strain (Figure 2A). Bacterial strain virulence towards *C. elegans* was measured as the  
142 median survival time of worms exposed to each bacterial strain (Figure 2B). Virulence varied  
143 continuously over a five-fold range, spanning from 1.5 days to over 10 days (Figure 2B). Indeed,  
144 the median worm survival on *P. aeruginosa* for strain z7, which exhibited the lowest virulence  
145 towards *C. elegans*, was greater than that of worms exposed to *E. coli* HB101, a strain commonly  
146 used in the laboratory to maintain worm stocks (Figure 2B). In addition, under SK conditions, the  
147 number of viable progeny produced by hermaphrodites exposed to strain z7 was indistinguishable  
148 from that of animals exposed to *E. coli* HB101 (Supplemental Figure 1A). Altogether, these  
149 results show that for our experimental set of 52 *P. aeruginosa* strains, virulence varies  
150 continuously over a wide range, from highly virulent strains, which kill *C. elegans* adults within 2  
151 days, to essentially completely avirulent strains that do not detectably impair worm lifespan or  
152 reproduction in comparison to their normal laboratory food.

153 To evaluate the potential contribution of strain isolation source to virulence against *C.*  
154 *elegans*, we compared the set of clinical isolates to the environmental isolates. Strains from  
155 clinical settings displayed lower mean virulence when compared to strains isolated from non-  
156 clinical, environmental settings (*t*-test, *p*-value = 0.047, Figure 2C). This result suggests that  
157 clinical strains isolated from infected humans do not constitute a biased sampling of strains that  
158 are relatively more pathogenic to worms than environmental isolates. Rather, it is possible that  
159 some clinical strains could harbor variations and adaptations that disfavor virulence towards  
160 worms.

161 Bacterial growth rate inside the *C. elegans* host intestine likely contributes to virulence.  
162 To assess whether strain-specific virulence against *C. elegans* could primarily reflect the relative  
163 growth rate capacity of each strain, we determined bacterial growth rates on LB media at 25°C  
164 (the temperature of the virulence assays) for a subset of 33 strains that span the virulence range.  
165 Here, the *in vitro* measurement of growth rates was used as a proxy for *in vivo* growth rates. We  
166 found that bacterial growth rate in LB medium showed no statistically significant correlation with  
167 virulence (Supplemental Figure 2A, Pearson's correlation,  $\rho = -0.3$ , *p*-value = 0.08).

168  
169



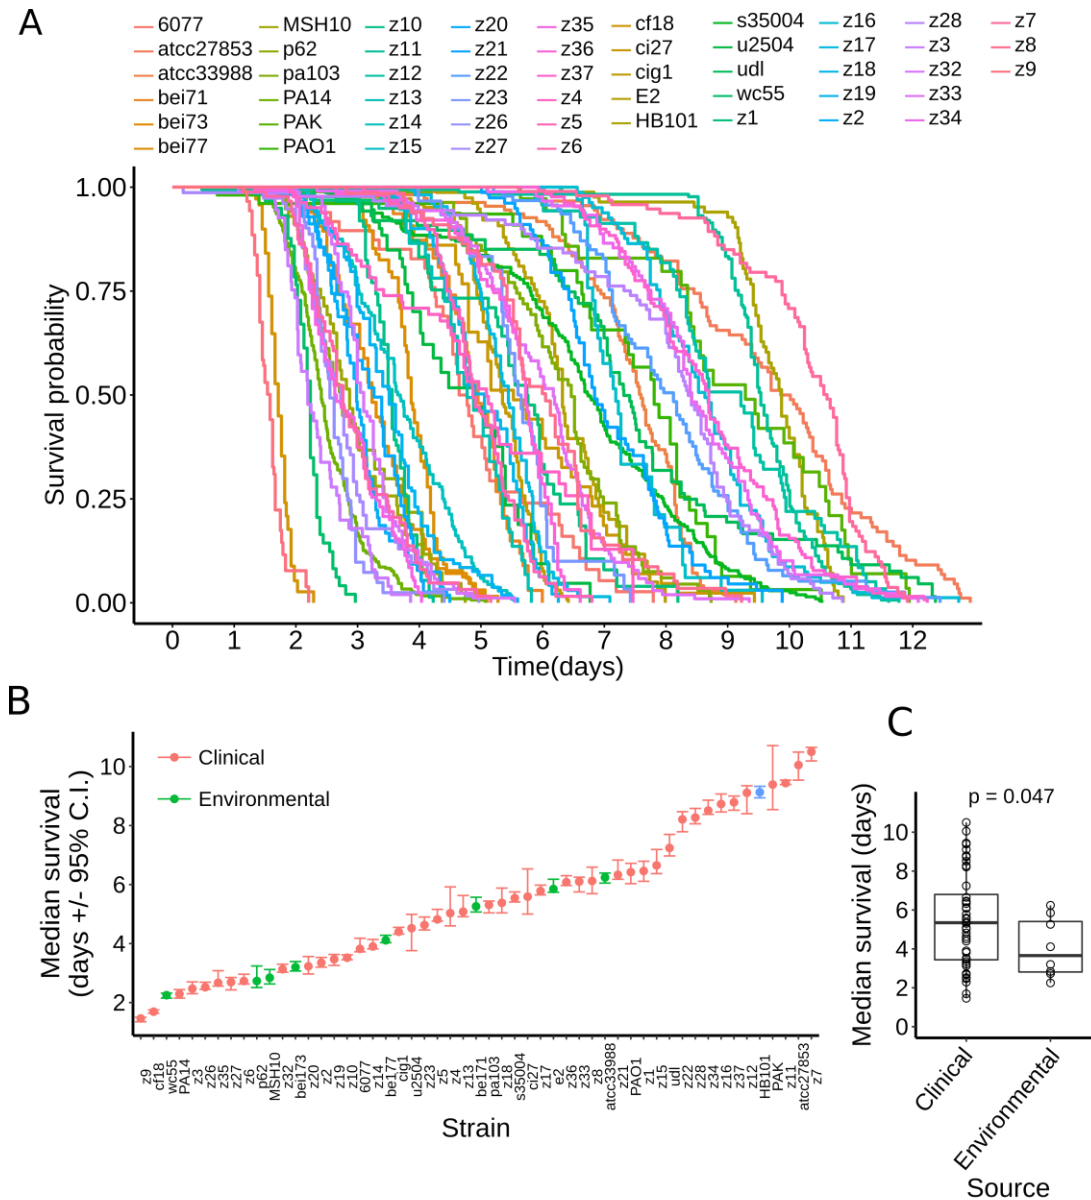

170

FIGURE 2

**Figure 2 *P. aeruginosa* virulence towards adult *C. elegans* worms.**

**A)** Survival curves of adult *C. elegans* worms exposed to the studied collection of 52 *P. aeruginosa* strains. **B)** Median survival of adult *C. elegans* worms exposed to the studied collection of *P. aeruginosa* strains (left panel, confidence interval, C.I.). The source of the strains is categorized as clinical (colored red) or environmental (colored green). The *E. coli* strain HB101 is included as comparative control and is colored blue. **C)** Box plot of worm median survival in relationship with strain source (right panel, environmental or clinical). p-value is indicated for the *t*-test comparison of virulence (*i.e.* induced worm median survival) between clinical and environmental strains.

171

172

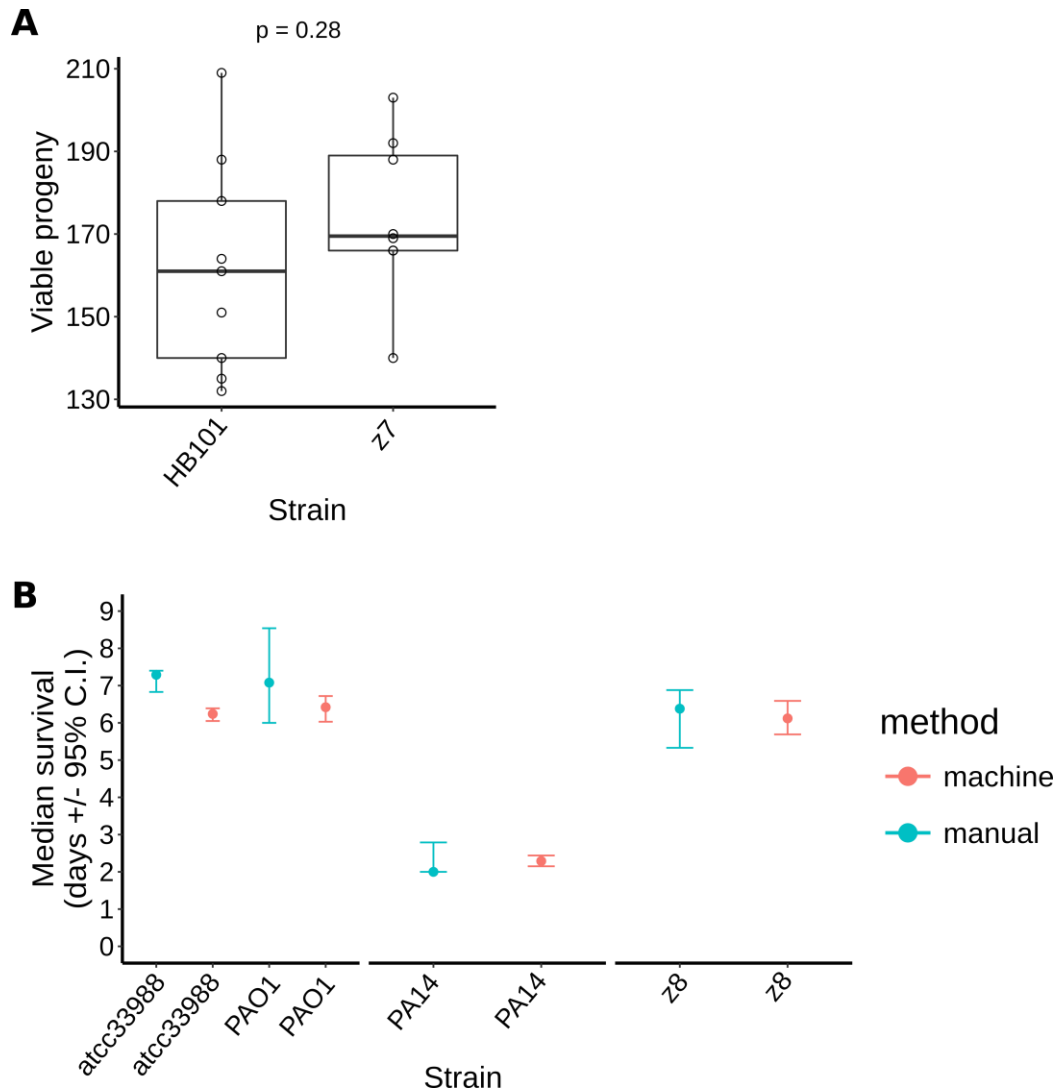

173  
174

### Supplemental Figure 1

A) Viable progeny counts for *P. aeruginosa* z7 and *E. coli* HB101. Adult *C. elegans* hermaphrodites were exposed to the above-mentioned bacterial strains using the same conditions for virulence assay with the exception that no FUDR was added (SK plates, 25°C). The total progeny of individual worms was manually counted. Comparison of the two conditions was done using the *t*-test (p-value indicated). B) Median survival of adult *C. elegans* worms exposed to four *P. aeruginosa* strains (confidence interval, C.I.) scored with two distinct methods. The methods to obtain the median survival estimates are: semi-automated scanning procedure (referred to as machine); manual scoring with a pick (referred to as manual).

175

176 *P. aeruginosa* virulence correlates with the presence of particular accessory genome  
177 elements

178 We employed gene association analysis to test whether virulence of *P. aeruginosa* strains  
179 towards *C. elegans* could be associated with the presence or absence of specific bacterial genes.  
180 In this analysis, virulence is defined as a quantitative trait for each strain, corresponding to the  
181 mean lifespan of adult *C. elegans* hermaphrodites when fed each of the strains. The association  
182 between genes and virulence was measured using the Mann-Whitney (MW) and linear regression  
183 (LR) tests, followed by a gene permutation approach, to assess the reliability of the p-value. Gene  
184 associations were assessed for the set of 11,731 protein-coding pangenomic genes of the 52  
185 experimental strains, and for a set of 83 previously-identified non-coding RNA genes (excluding  
186 rRNAs and tRNAs) of *P. aeruginosa*.

187 The small non-coding RNAs of bacteria fulfill diverse gene regulatory roles and can modulate  
188 pathways required for virulence (Kay et al., 2006; Zhang et al., 2017). Interestingly, we noted that  
189 most of the non-coding RNA genes we examined are core genome elements (78%, 65/83 genes).  
190 We found no statistically significant association between the non-coding RNAs of *P. aeruginosa*  
191 and virulence (Supplemental Figure 2B, all p-value > 0.05 for the MW and LR tests).

192 Among the 6,537 protein-coding accessory genes present in the 52-strain experimental  
193 panel, we identified 79 genes significantly associated with virulence, either positively, or  
194 negatively (Figure 3, p-value < 0.01 for the MW or LR tests). For 35 of these 79 virulence-  
195 associated genes (44%), their presence defined a set of strains with higher virulence compared to  
196 the strain set where the same genes were absent (Figure 3B). We refer to them as high virulence-  
197 associated genes (or ‘HVA genes’ for short). For the other 44 genes (56%) their presence  
198 corresponded to strains with lower virulence (Figure 3B). We refer to these as low virulence-  
199 associated genes (or ‘LVA genes’ for short). Each strain harbors a different subset of the 79  
200 associated genes. For example, strain PA14, a highly virulent strain, has 19 HVA genes and 1  
201 LVA gene (Figure 3C). On the other side of the spectrum, strain ATCC27853, a poorly virulent  
202 isolate, has 5 HVA genes and 41 LVA genes (Figure 3D). A description of the 79 genes  
203 associated with higher or lower virulence is presented in Supplemental Table 2.

204 The 79 virulence-associated genes encompass a variety of functions, although for many of  
205 the associated genes, a functional annotation is not available (43% of HVA genes and 64% of the  
206 LVA genes are annotated as ‘hypothetical proteins’). Associated genes could be categorized as  
207 follows: 1) Genes with known regulatory roles: Such roles can be ascribed to strain PA14 genes  
208 PA14\_27700 (HVA gene #13286) and PA14\_27690 (HVA gene #15454), which encode a cAMP-  
209 dependent protein kinase and RNA polymerase sigma factor, respectively. A second example is  
210 the *qsrO* gene (LVA gene #17701), which negatively regulates a highly conserved quorum  
211 sensing pathway (Köhler et al., 2014). 2) Genes that encode proteins associated with structural  
212 roles: The *pslM* (HVA gene #2628) and *pslK* (HVA gene #2479) genes belong to the *psl*  
213 polysaccharide biosynthetic pathway, a polymer that contributes to biofilm formation (Franklin et  
214 al., 2011). Other examples are the HVA genes #6371, #8276 and #8113, which encode homologs  
215



216

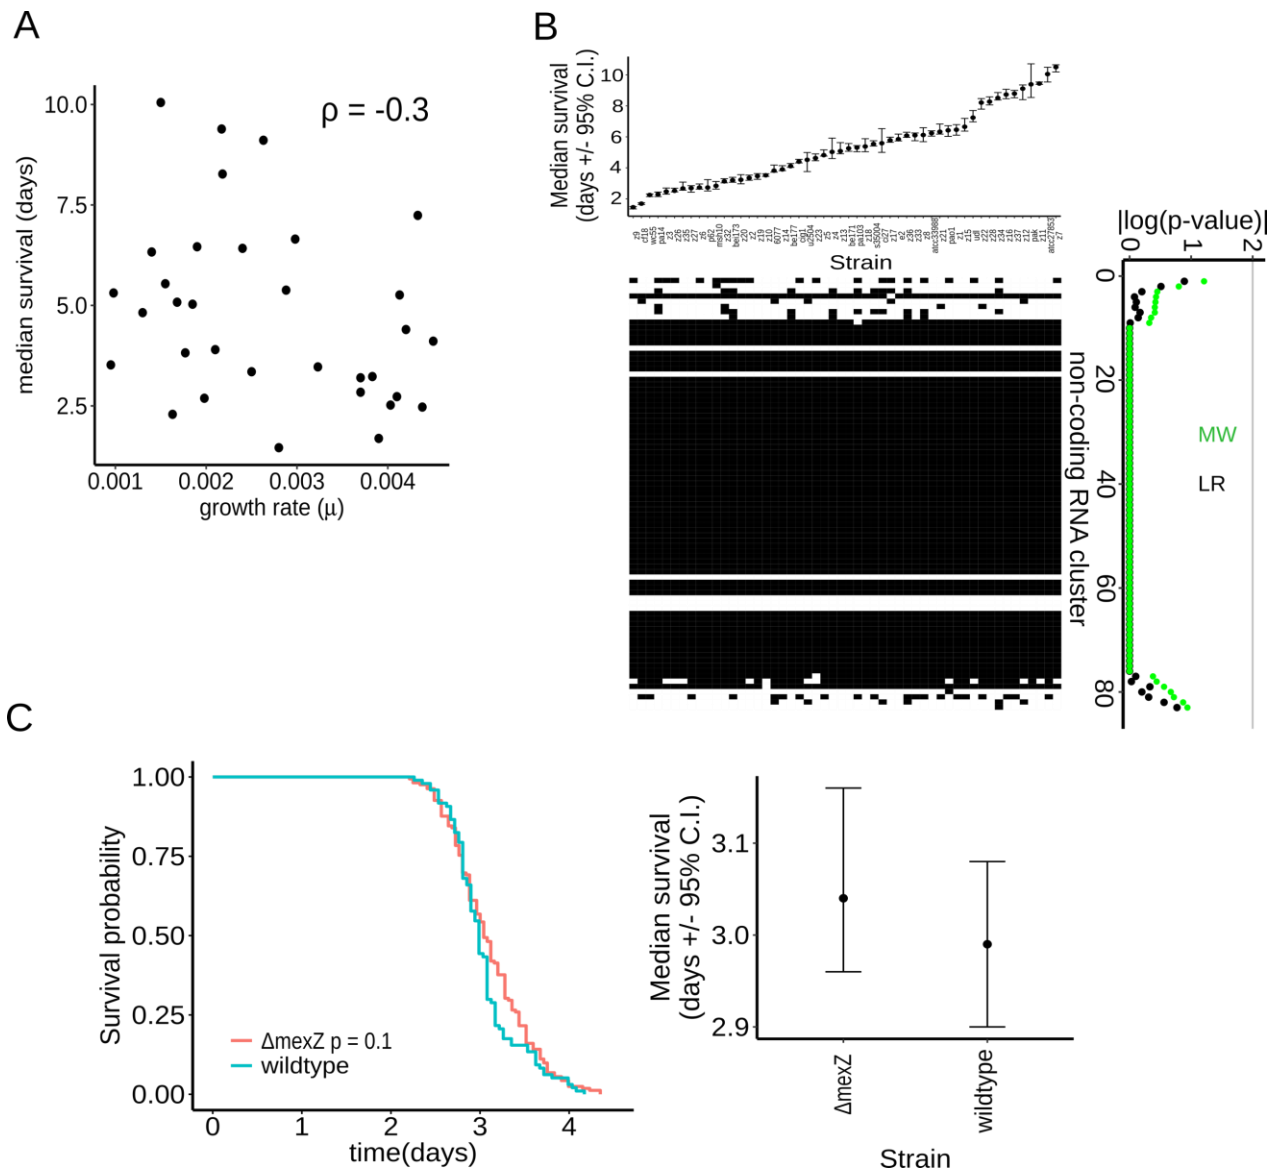

217  
218

### Supplemental Figure 2

**A)** Association between bacterial growth rates in LB medium ( $\mu$ ) and virulence among *P. aeruginosa* strains. **B)** Association between non-coding RNAs of *P. aeruginosa* and bacterial virulence: (Top panel) Median survival of adult *C. elegans* worms, similar to Figure 2B. (Bottom left panel): gene presence/absence matrix for non-coding RNAs. Presence is indicated with black squares and absence with white squares. Non-coding RNAs (rows) are aligned with the corresponding MW and LR p-values (bottom right panel), shown as  $|\log_{10}(\text{pval})|$ . Rows are ordered from association with high virulence to association with low virulence. **C)** Survival curves (left panel) and median survival (right panel, confidence interval 'C.I.') of adult *pmk-1(lf)* *C. elegans* worms exposed to wild-type and  $\Delta\text{mexZ}$  strains of *P. aeruginosa* z8. Pairwise comparison of the survival curves between the two strains was done using the logrank test. The test p-value is indicated in the curve legend.

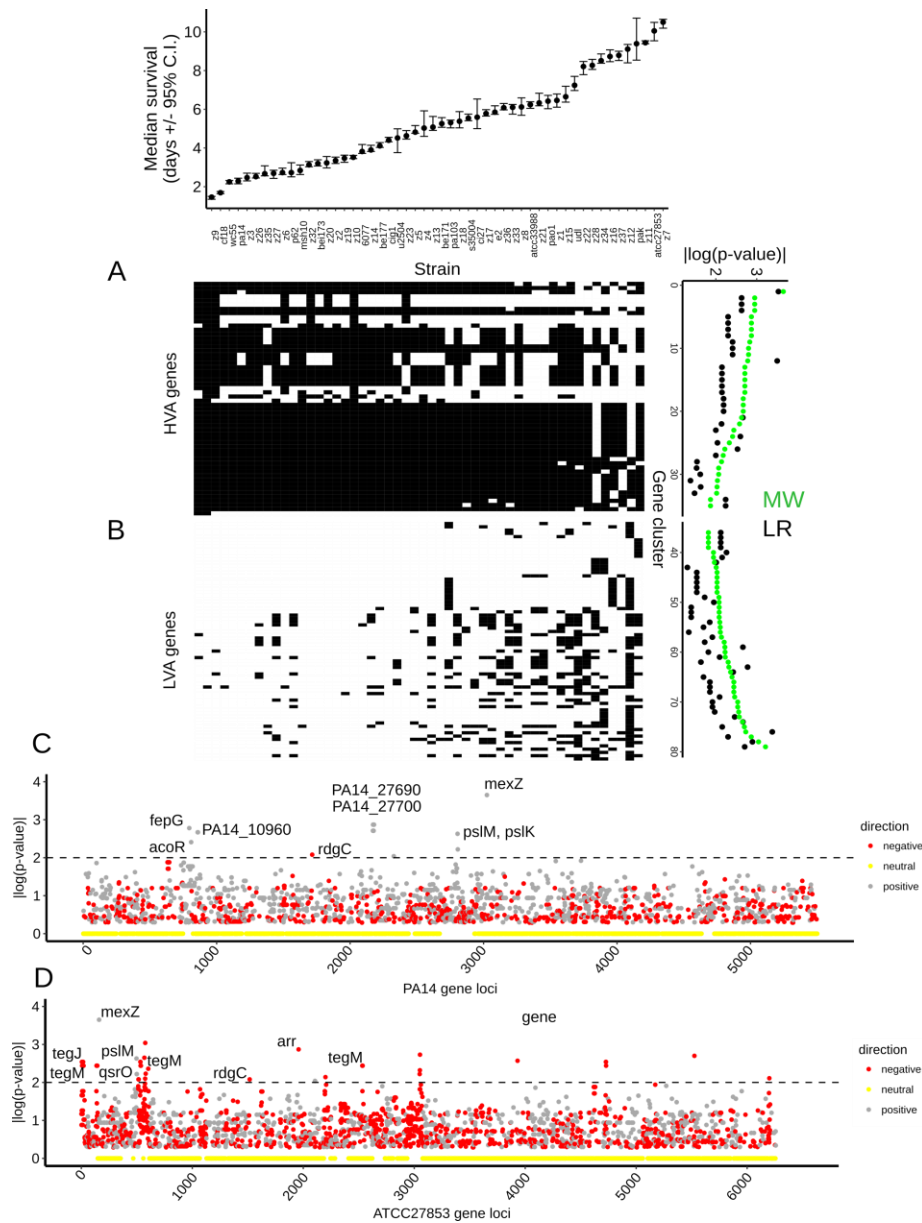

219  
220

### Figure 3 Association between protein-coding genes of *P. aeruginosa* and bacterial virulence.

A) Median survival of adult *C. elegans* worms exposed to a collection of 52 *P. aeruginosa* strains. The strains are ordered from high to low virulence (left to right) and aligned with the matrixes below. (B) Left panels: gene presence/absence matrix for HVA genes (top) and LVA genes (bottom). Gene presence is indicated with black squares and absence with white squares. Genes (rows) are aligned with the corresponding p-values. Right panels: Association statistics (p-value of MW and LR tests) for the HVA and LVA genes, shown as  $|\log_{10}(\text{pval})|$ . (C-D) Associated genes present in the strain PA14 (C) or ATCC27853 (D). Gene loci are plotted against the association statistic (p-value of MW test), shown as  $|\log_{10}(\text{pval})|$ . Loci are colored according to the directionality of the gene-virulence association (grey: positively associated; red: negatively associated; yellow: p-value equals zero). Horizontal dashed lines demarcate a significance threshold ( $p < 0.01$ ).

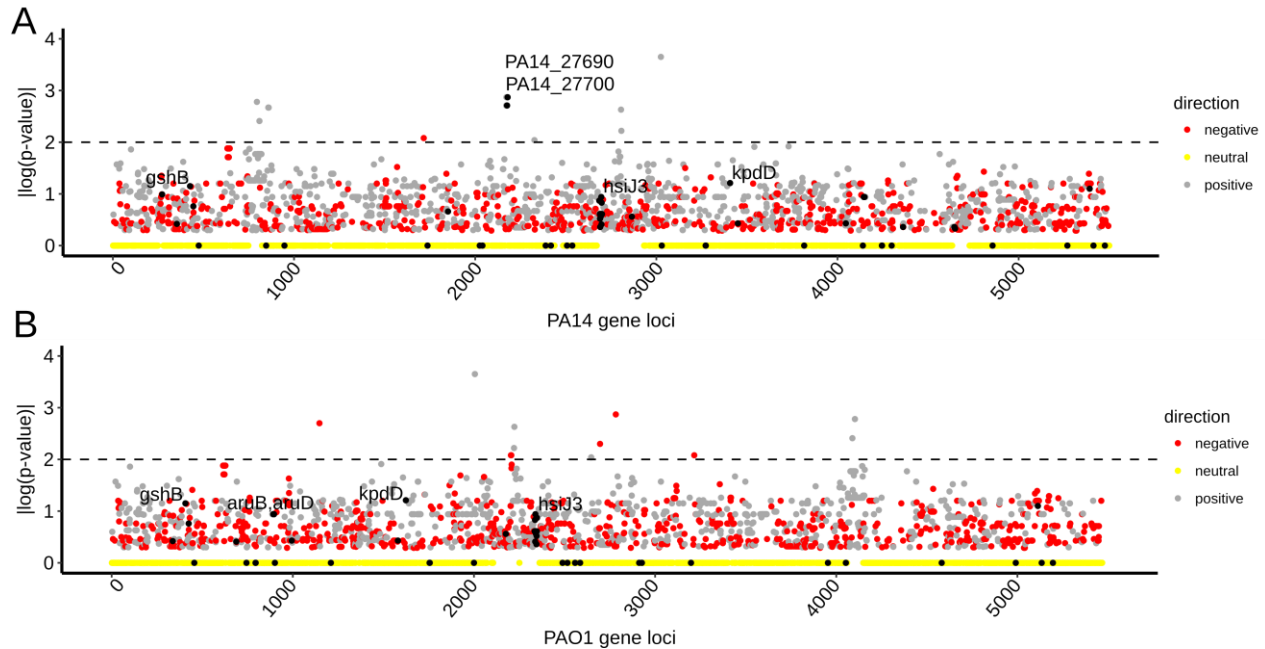

221

#### Figure 4 Distribution and features of previously-identified virulence genes

**A-B)** Gene association for PA14 (**A**) and PAO1 (**B**) protein-coding gene loci. Gene loci are plotted against the association statistic (p-value of MW test), shown as  $|\log_{10}(\text{p-value})|$ . Previously known virulence genes are indicated with black dots and the top 5 most associated genes labelled. The top known genes associated with virulence are PA14\_27690 and PA14\_27700. Loci are also colored according to the directionality of the gene-virulence association (grey: positively associated; red: negatively associated; yellow: p-value equals zero). Horizontal dashed lines demarcate a significance threshold ( $p < 0.01$ ).

222

223 of *wbpZ*, *wbpL* and *wzz*, respectively. These homologs encode enzymes required for LPS  
224 Oantigen synthesis (Rocchetta et al., 1999), a structural component of the bacterial outer  
225 membrane. 3) Mobile genetic elements: Several of the genes associated with low virulence are  
226 annotated as integrase (genes #6157, #4439, #10878, #8459)", or phage-related (genes #8274,  
227 #5222), suggests that these genes are likely to encode components of mobile genetic elements.  
228 Further support for the mobility of these elements comes from their targeting by CRISPR spacers  
229 (see below).

230 Among the genes that we found to be associated with high virulence across the 52-strain  
231 panel, two HVA genes, PA14\_27700 and PA14\_27690, have been previously characterized as  
232 virulence genes. Previous genetic analysis showed that loss of function mutations in either  
233 PA14\_27700 (HVA gene #13286) or PA14\_27690 (HVA gene #14622) compromised the  
234 virulence of strain PA14 against *C. elegans* (Feinbaum et al., 2012) under the SK assay  
235 conditions, the same condition used in the present study. Our examination of the published  
236 literature identified a total of 60 previously-described *P. aeruginosa* virulence genes  
237 (Supplemental Table 3), that were identified by genetic analysis of virulence against *C. elegans*  
238 for two commonly studied *P. aeruginosa* strains, PA14 and PAO1 (Figure 4A-B), both of which  
239

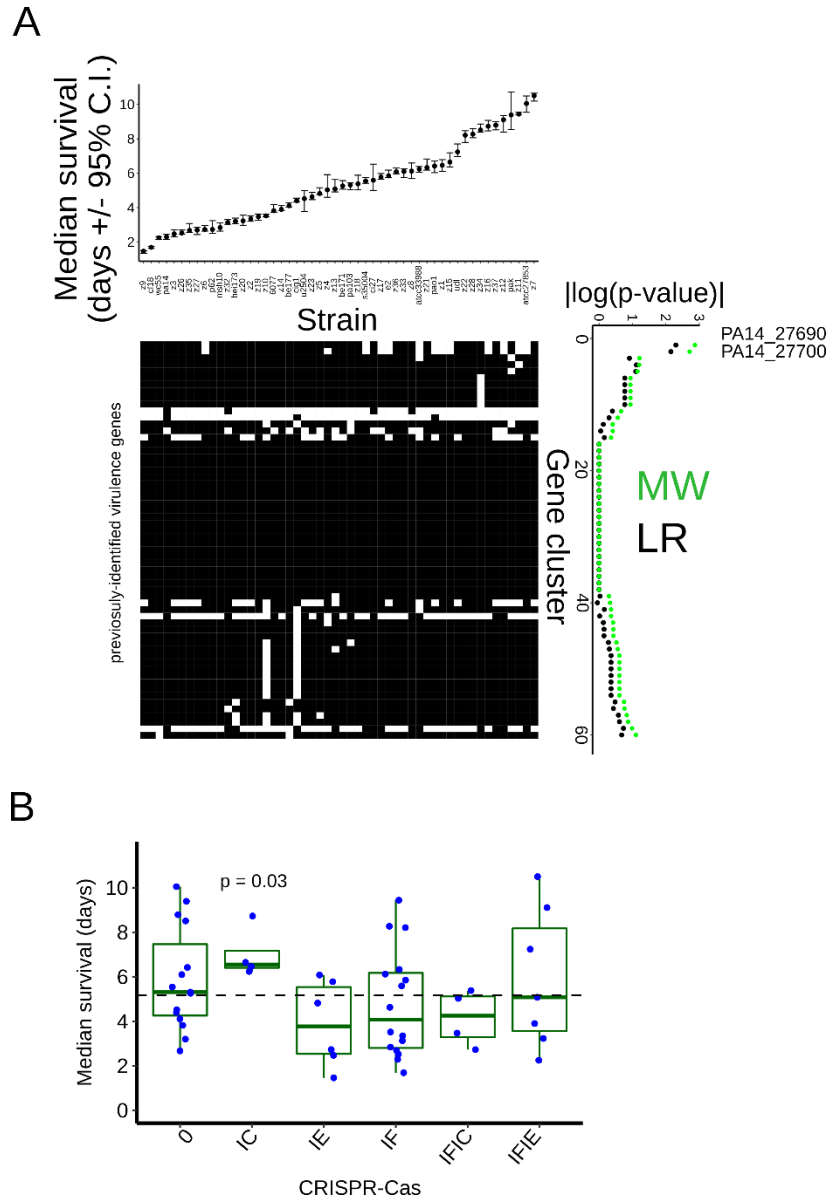

240  
241

### Supplemental Figure 3

(A) Distribution and association of previously known virulence genes. (Top panel) Median survival of adult *C. elegans* worms exposed to the studied collection of *P. aeruginosa* strains. The strains are ordered from high to low virulence (left to right) and aligned with the matrix below. (Bottom left) gene presence/absence matrix for known virulence genes. Gene presence is indicated with black squares and absence with white squares. Genes (rows) are aligned with the corresponding p-values. (Bottom right) Association statistics (p-value of MW and LR tests) for the genes (shown as  $|\log_{10}(p\text{-value})|$ ). Rows are ordered from association with high virulence to association with low virulence. (B) Relationship between CRISPR-Cas subtypes and virulence. Strains are categorized by their combination of CRISPR-Cas subtypes. Strains with type CRISPR-Cas I-C systems have significantly lower virulence than their complementary strain set (t-test,  $p\text{-value} = 0.03$ ).

242 are included in our experimental test panel. Upon analysis of these 60 genes, we found that two of  
243 the HVA genes associated with virulence in our 52-strain panel (Supplemental Table 2), *pslM*  
244 (HVA gene #2628) and *pslK* (HVA gene #2479), were not previously identified as virulence  
245 genes in PA14 or PAO1, but are contained in the same *psl* operon as the previously known  
246 virulence gene *pslH* (gene #6064), which was shown to be required for full virulence in the PAO1  
247 strain (van Tilburg Bernardes et al., 2017).

248 Other than PA14\_27700, PA14\_27690 and the *psl* operon genes (*pslM*, *pslK*), no other  
249 genes from the set of 60 previously-described virulence factors showed association with virulence  
250 in this study (Figure 4; Supplemental Figure 3A). Notably, 51 of the 60 known virulence genes  
251 (85%) belong to the core genome of our panel of 52 experimental strains, explaining the null  
252 association observed. The remaining previously-known virulence genes that did not emerge as  
253 HVA genes in our 52-strain panel may not have a strong enough impact on virulence across our  
254 52 stains for a variety of potential reasons, including strain-specific epistasis from other accessory  
255 genome elements.

### 256 257 **Genetic tests identify *P. aeruginosa* accessory genome elements that contribute to decreased** 258 **or increased virulence towards *C. elegans***

259 The statistical association of particular protein-coding genes with either high virulence (in  
260 the case of HVA genes) or low virulence (in the case of LVA genes) across the set of 52  
261 experimental strains tested here could in principle reflect the presence or absence of single genes  
262 that are individually necessary and/or sufficient to impact virulence. In such cases, loss-of-  
263 function or gain-of-function genetic manipulations of the relevant strains would be expected to  
264 measurably impact virulence. However, single gene causality may in some cases be masked by  
265 strain-specific epistatic interactions, for example with other accessory genes. It would not be  
266 unexpected if some of the HVA and LVA genes that we identified were to function in  
267 combination, such that the contribution of each individual gene would not be easily evident from  
268 single gene knock out or overexpression tests. It is also possible that a gene with no direct  
269 function in virulence could nevertheless show association with virulence because of a  
270 physiological or ecological linkage between the function of that gene and the function and/or  
271 acquisition of *bona fide* virulence factors.

272 The above expected caveats notwithstanding, we used loss-of-function and gain-of-  
273 function approaches to test whether individual HVA genes are necessary and/or sufficient to  
274 support high virulence, and conversely, whether LVA genes are necessary and/or sufficient to  
275 impose reduced virulence. For most of these genetic tests we selected strain z8, which exhibits an  
276 intermediate level of virulence, contains members of both the HVA and LVA gene sets, and is  
277 amenable to genome-editing through use of its endogenous CRISPR-Cas system.

278 The set of HVA genes included previously validated virulence genes (e.g. PA14\_27700,  
279 PA14\_27690), which we did not re-test here. Instead, we evaluated the potential role in virulence  
280 for *mexZ* (gene #14466), which had not been previously tested genetically. We constructed an in-  
281 frame deletion of *mexZ* in strain z8 ( $\Delta$ *mexZ*), but no difference in virulence was found for  $\Delta$ *mexZ*





A

| strain | gene(s)      | association | frequency (% of strains) |
|--------|--------------|-------------|--------------------------|
| z8     | tegG to tegN | LVA         | 17                       |
| z8     | ghlO         | LVA         | 15                       |
| z8     | qsrO         | LVA         | 40                       |

B

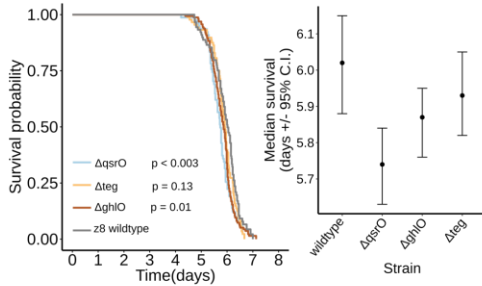

C

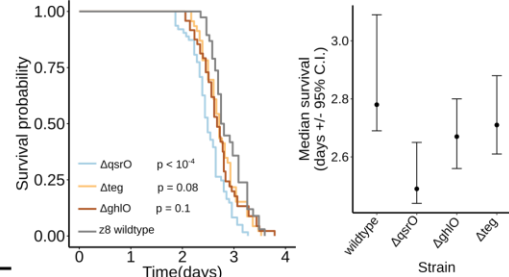

D

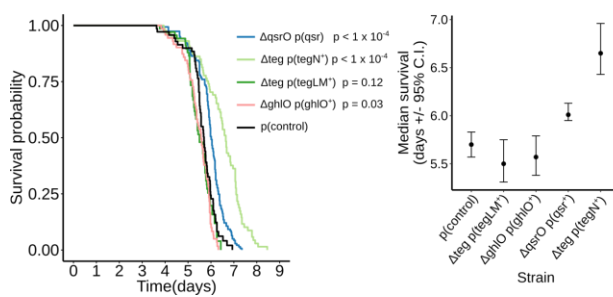

E

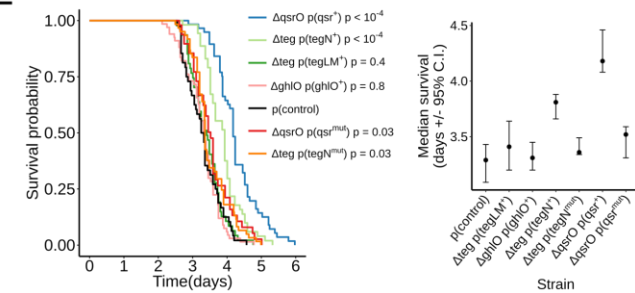

283

### Figure 5 Bacterial virulence upon loss or expression of genes associated with lower virulence

**A)** Summary of the tested LVA genes. Strain, gene nomenclature and gene frequency are indicated. **B-C)** Survival curves and median survival (confidence interval, C.I.) of two strains of adult *C. elegans* worms exposed to three strains of *P. aeruginosa* z8 with deletions in genes associated with lower virulence (*i.e.*  $\Delta qsrO$ ;  $\Delta teg$ ;  $\Delta ghlO$ ). Wildtype worms are analyzed in **(B)**, *pmk-1(lf)* worms in **(C)**. Pairwise comparisons of the survival curves between each strain and the z8 wildtype isolate were done using the logrank test. The test p-values are indicated next to each mutant strain in the legend. **D)** Survival curves and median survival (confidence interval 'C.I.') of wildtype adult *C. elegans* worms exposed to four strains of *P. aeruginosa* z8 with plasmids expressing genes in gene blocks associated with lower virulence (*i.e.*  $\Delta qsrO$  p(qsr<sup>+</sup>);  $\Delta teg$  p(tegN<sup>+</sup>);  $\Delta teg$  p(tegLM<sup>+</sup>);  $\Delta ghlO$  p(ghlO<sup>+</sup>)). Pairwise comparisons of the survival curves between each strain and the z8 wildtype strain with control plasmid (p(control)) were done using the logrank test. The test p-values are indicated next to the corresponding strain in the legend. **E)** Survival curves and median survival (confidence interval 'C.I.') of *pmk-1(lf)* adult *C. elegans* worms exposed to six strains of *P. aeruginosa* z8 with plasmids expressing genes associated with lower virulence. Four bacterial strains express wildtype bacterial genes (*i.e.*  $\Delta qsrO$  p(qsr<sup>+</sup>);  $\Delta teg$  p(tegN<sup>+</sup>);  $\Delta teg$  p(tegLM<sup>+</sup>);  $\Delta ghlO$  p(ghlO<sup>+</sup>)). Two additional bacterial strains express mutated bacterial genes (*i.e.*  $\Delta qsrO$  p(qsr<sup>mut</sup>);  $\Delta teg$  p(tegN<sup>mut</sup>)). Pairwise comparisons of the survival curves between each strain and the z8 wildtype strain with control plasmid (p(control)) were done using the logrank test. The test p-values are indicated next to the corresponding strain in the legend.

284

285

286

287 when compared to the wildtype z8 strain (Supplemental Figure 2C). The absence of a direct effect  
288 on virulence of strain z8 suggests that the association of *mexZ* with virulence amongst the panel  
289 of 52 strains could be secondary to additional underlying factors. *mexZ* is frequently mutated in  
290 clinical isolates, as a part of the bacterial adaptations to acquire antibiotic resistance (Aires et al.,  
291 1999; Westbrook-Wadman et al., 1999).

292 We next selected genes associated with low virulence to test their effects by using loss of  
293 function and gain of function approaches. We assigned gene names to the genes selected for study  
294 that were not previously named (Figure 5A and Supplemental Table 4). The selected genes belong  
295 to three genomic loci: the *ghlO* gene (LVA gene# 25296) is associated with virulence as a single  
296 gene (*i.e.* no additional neighboring genes are associated with virulence); the *qsrO* gene (LVA  
297 gene# 17701, (Köhler et al., 2014)) belongs to a four gene operon (referred to as ‘*qsr*’ operon);  
298 the *tegG* to *tegN* genes (LVA genes # 5222, 5330, 10513, 15466, 21386, 21557, 26140),  
299 constitute a block of contiguous genes in bacterial chromosomes (referred to as the ‘*teg* block’).

300 We constructed strain z8 mutants carrying in-frame deletions of *ghlO*, *qsrO* and the *teg*  
301 gene block ( $\Delta ghIO$ ,  $\Delta qsrO$  and  $\Delta teg$ , respectively, see also Supplemental Table 5) and measured  
302 virulence on two *C. elegans* strains: wildtype and *pmk-1(lf)* mutant. The *pmk-1(lf)* mutant has an  
303 impaired p38/PMK-1 pathway that compromises the worm’s response to *P. aeruginosa* PA14  
304 (Kim et al., 2002) and z8 strains (Figure 5B-C). This worm mutant was used as a strain with a  
305 genetically ‘sensitized’ background. Deletion of *qsrO*, but not of *ghlO* or *teg*, led to a mild but  
306 significant reduction in the survival of wildtype worms, indicating an increased virulence of the  
307  $\Delta qsrO$  z8 bacteria. Similarly, deletion of *qsrO*, but not of *ghlO* or *teg*, led to a mild but significant  
308 reduction in the survival of *pmk-1(lf)* worms (Figure 5B-C). These results support a direct  
309 negative role for the *qsrO* gene in the regulation of virulence. Interestingly, the *qsrO* gene had  
310 been reported previously to have a negative regulatory function on quorum sensing (QS), a key  
311 contributor to *P. aeruginosa* virulence (Köhler et al., 2014).

312 To test if the selected genes associated with low virulence can modulate virulence when  
313 their expression is enhanced, we constructed strains containing multi-copy plasmids that encode  
314 the *ghlO* gene (p(*ghlO*<sup>+</sup>)), the *qsr* operon (p(*qsr*<sup>+</sup>)), and *teg* block genes (p(*tegLM*<sup>+</sup>) and p(*tegN*<sup>+</sup>))  
315 driven by their native promoters in their respective mutant backgrounds (Supplemental Table 5).  
316 The virulence of these strains was measured and compared to a strain carrying an empty plasmid  
317 control (p(control)). The virulence of strains overexpressing the *qsrO* and *tegN* genes was  
318 significantly reduced compared to the control (Figure 5C,  $p < 10^{-4}$ ). In contrast, no difference in  
319 virulence was observed for strains overexpressing the *ghlO* and *tegLM* genes (Figure 5D). Strains  
320 overexpressing *qsrO* or *tegN* also displayed reduced virulence when tested on  
321 immunocompromised *pmk-1(lf)* (Figure 5D,  $p < 10^{-4}$ ). This effect of diminished virulence was  
322 abolished when the *qsrO* and *tegN* genes in the plasmids were mutated by introduction of an early  
323 stop codon (p(*qsr*<sup>mut</sup>) and p(*tegN*<sup>mut</sup>), Figure 5E, see also Supplemental Table 5).

324 These results suggest a direct role for the *qsrO* and *tegN* genes in the negative regulation  
325 of virulence. By contrast, our results suggest the associations of *mexZ*, *ghlO*, and *tegLM* genes  
326 with high virulence may not reflect direct causal roles in virulence per se. Rather, these latter

327 associations may be secondary to additional underlying factors related to physiological or  
 328 ecological linkages to virulence. In particular, in the light of our findings that at least some genes  
 329 of the accessory genome of *P. aeruginosa* (for example, *qsrO* and *tegN*) can directly modulate  
 330 virulence implies that processes of selective gene deletion and acquisition (such as horizontal  
 331 gene transfer, HGT) are critical for the evolution of *P. aeruginosa* virulence in the wild.  
 332

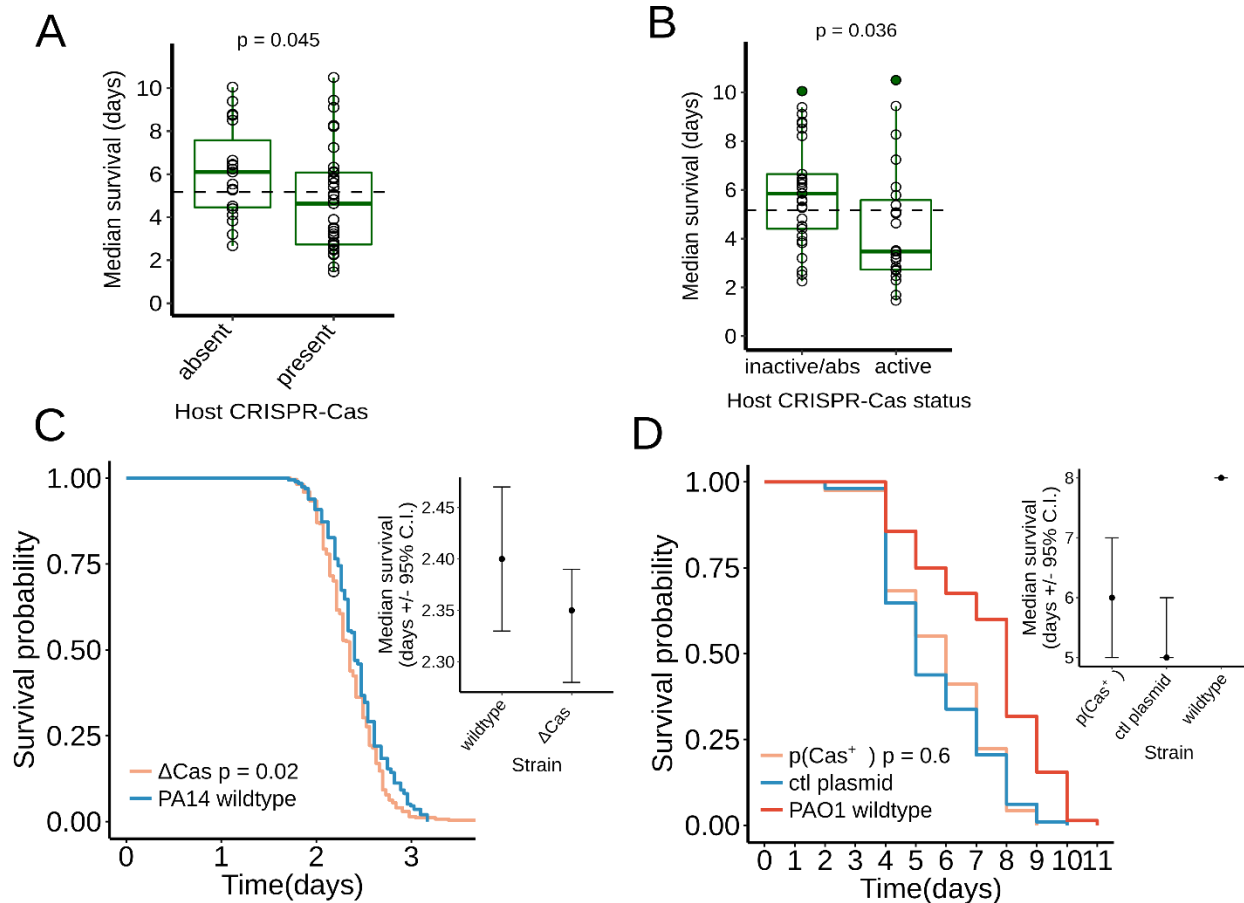

333  
 334

**Figure 6 Relationship between virulence and CRISPR-Cas defense systems of *P. aeruginosa*.**

**A-B)** Box plots of worm median survival in relationship with CRISPR-Cas presence/absence and activity status. **A)** Strains are partitioned according to the presence/absence of host CRISPR-Cas systems (I-E, I-F). **B)** Strains are displayed according to their CRISPR-Cas status in two categories: active, or inactive-absent (inactive/absent). The median virulence of the complete set of strains displayed on each graph is indicated with the dashed horizontal line. p-values are indicated for the *t*-test comparison of virulence between the two groups represented (A-B). **C-D)** Survival curves (left panels) and median survival (right panels, confidence interval ‘C.I.’) of adult *C. elegans* worms exposed to strains of *P. aeruginosa*. **(C)** Virulence of PA14 wildtype and PA14 with deletion of the type I-F Cas genes ( $\Delta$ Cas). **(D)** Virulence of PAO1 wildtype; PAO1 with plasmid expressing the type I-F Cas genes (pCas<sup>+</sup>); PAO1 with control plasmid (ctl plasmid). Pairwise comparison of the survival curves was done using the logrank test. The p-values are indicated in the respective legend.

335 **Active CRISPR-Cas systems positively but indirectly correlate with *P. aeruginosa* virulence**

336 The composition of the *P. aeruginosa* accessory genome is shaped by uptake of genes  
337 from other microorganisms via horizontal gene transfer (HGT), frequently involving mobile  
338 genetic elements (MGE) such as prophages and ICEs (integrative and conjugative elements).  
339 HGT events can be restricted by diverse classes of bacterial defense systems, which protect cells  
340 against the acquisition of elements that could confer deleterious phenotypes. Since we observed  
341 that elements of the *P. aeruginosa* accessory genome associate positively or negatively with  
342 virulence, we used gene association analysis to test for the association of virulence against *C.*  
343 *elegans* with the presence or absence of restriction-modification (RM) systems, CRISPR-Cas  
344 systems, and a recently identified cohort of ten novel defense systems (Doron et al., 2018). These  
345 kinds of defense systems are widely distributed in bacteria and display innate (RM systems) or  
346 adaptive immune characteristics (CRISPR-Cas systems). We first analyzed adaptive immune  
347 systems on the premise that these systems may be able to selectively filter out deleterious genetic  
348 elements.

349 Type I CRISPR-Cas systems (Cas proteins and spacer arrays) are present in 71% of the 52  
350 strains (37/52 strains; Supplemental Table 1) and belong to three different subtypes, that can be  
351 absent/present independently of each other: type I-F (73%), type I-E (35%) and I-C (21%). This  
352 distribution of CRISPR-Cas systems is consistent and similar to previous surveys of *P.*  
353 *aeruginosa* CRISPR-Cas systems (van Belkum et al., 2015).

354 In addition to the genomic presence of CRISPR-Cas loci, we also investigated if the  
355 identified CRISPR-Cas systems were predicted to be active or inactive based on the  
356 presence/absence of known anti-CRISPR genes. Anti-CRISPR proteins, are virus-encoded and  
357 can inhibit CRISPR-Cas systems, blocking their immune function (reviewed in (Pawluk et al.,  
358 2017)). We identified a set of 22 anti-CRISPR gene families in 31% of the 52 *P. aeruginosa*  
359 genomes and cataloged each strain's CRISPR-Cas status as: 1) 'active' if it has at least one  
360 CRISPR-Cas system with no known cognate anti-CRISPR gene present in genome; or 2) having  
361 an 'inactive/absent' system if CRISPR-Cas is absent or where cognate anti-CRISPR gene(s) are  
362 found concomitantly with CRISPR-Cas (Supplemental Table 1).

363 We compared the above anti-CRISPR approach for identifying strains with inactive  
364 CRISPR/Cas to an alternative criterion: the presence in the same bacterial genome, of a CRISPR-  
365 Cas spacer with its DNA target, a condition referred to as spacer 'self-targeting' (Stern et al.  
366 2010). The presence in the same genome of a CRISPR-Cas locus and one or more self-targeting  
367 spacers is considered to reflect an inactive effector status of that CRISPR-Cas locus, because  
368 genome cleavage by an active CRISPR-Cas system is expected to be lethal to the bacterial cell  
369 (Bikard et al., 2012; Vercoe et al., 2013). In our collection, we found 11 strains with CRISPR-Cas  
370 and at least one self-targeting spacer with a full match to its genomic target (Supplemental Table  
371 1). Most of these strains (9 out of 11, corresponding to 82% of them) were included in the set of  
372 inactive strains by the anti-CRISPR approach. The sets of strains scored as CRISPR-Cas  
373 'inactive' using the two approaches are highly similar (McNemar's chi-squared test, p-value = 1),

374 and both methods yielded similar results when assessing the association of virulence with  
375 CRISPR activity (below; Figure 6B).

376 Next, we analyzed the CRISPR-Cas systems in relationship to virulence. We first  
377 considered separately the subtypes I-F, I-E, I-C and their combinations (Supplemental Figure 3B).  
378 Strains with type I-C CRISPR-Cas systems showed lower virulence compared to that of all other  
379 strains (t-test,  $p = 0.03$ ). In contrast, all other CRISPR-Cas subtypes showed no statistical  
380 difference in virulence compared to their respective complementary sets (t-test,  $p > 0.05$ ). The  
381 distinct association observed for I-C systems, coincides with the fact that *P. aeruginosa* type I-C  
382 CRISPR-Cas systems have been exclusively found inside pKLC102-like ICEs (van Belkum et al.,  
383 2015). Defense systems inside ICEs, such as type I-C CRISPR-Cas systems, likely fulfill a role in  
384 the ICE's lifecycle and may not primarily provide immune protection to the bacterial host. Based  
385 on this evidence, we did not consider I-C systems part of *P. aeruginosa* complement of immune  
386 systems, and so in subsequent analysis we considered only subtypes I-E and I-F as comprising the  
387 bacterial cell's CRISPR-Cas systems.

388

389

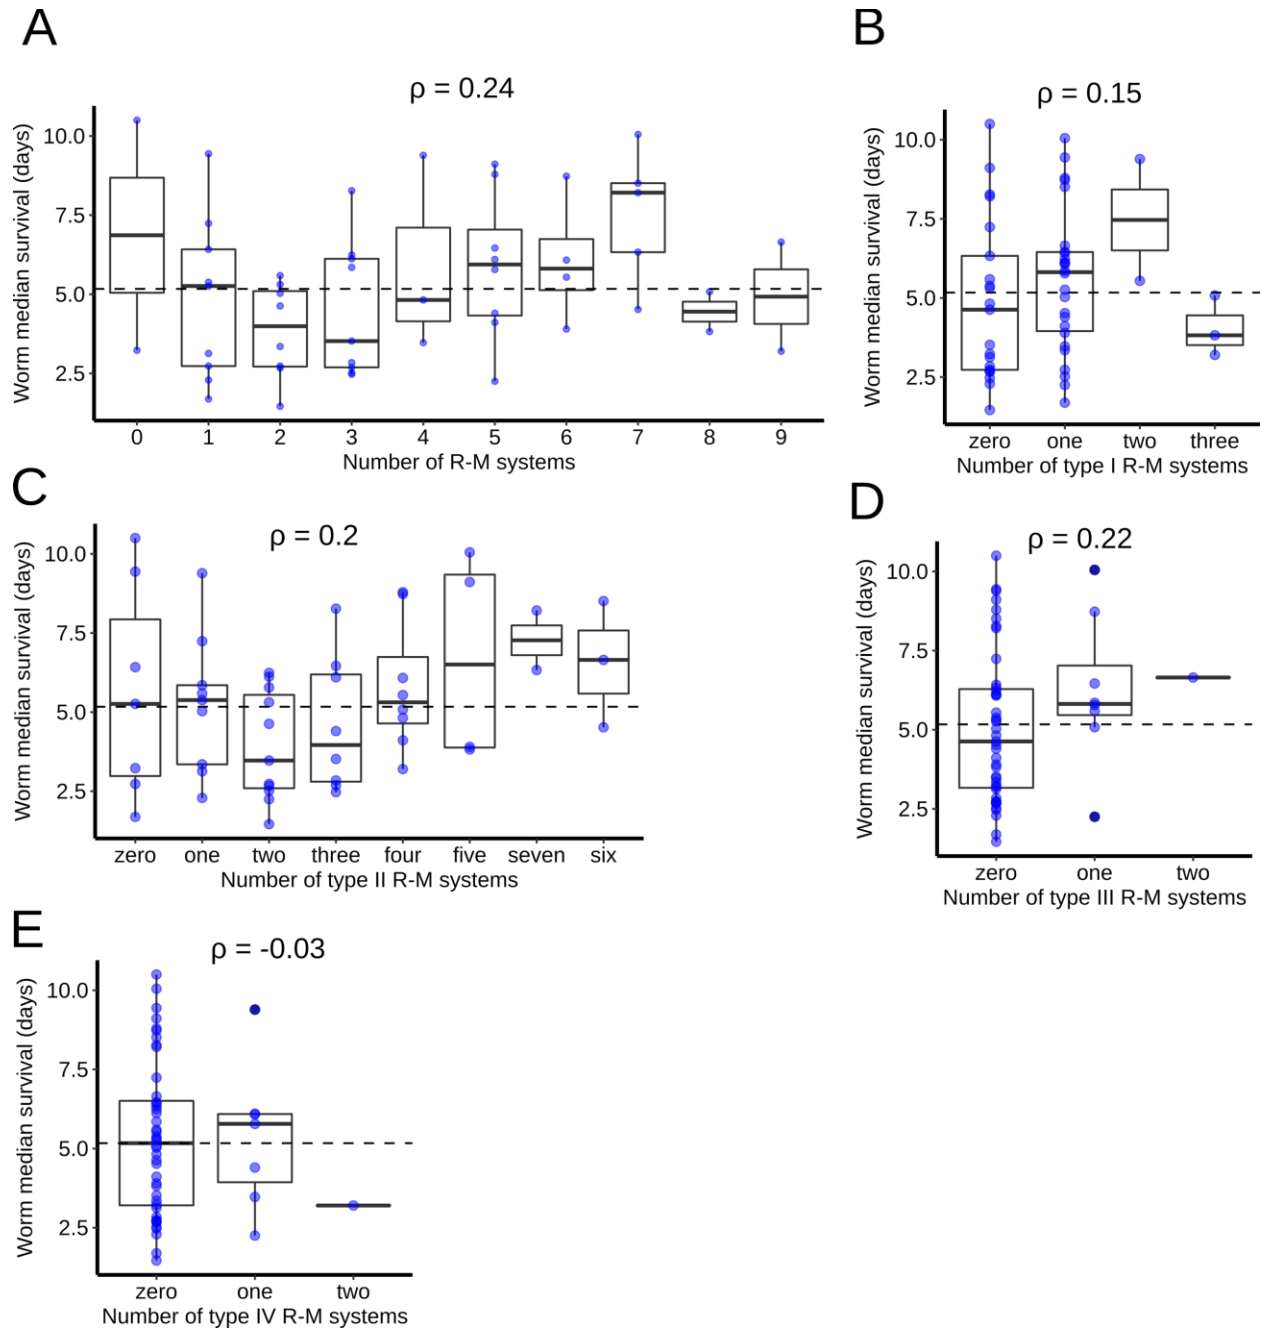

390

### Supplemental Figure 4. Relationship between Restriction-Modification (RM) systems and virulence.

**A-E)** Box plots of worm median survival (virulence) in relationship with the abundance and type of RM systems. **A)** The total number of RM systems per strain is displayed. **B-E)** The number of RM systems per strain is displayed separately for type I (**B**), II (**C**), III (**D**) and IV (**E**) systems. Correlation values are indicated in all graphs ( $\rho$ , Spearman rank correlation). The median virulence of the complete set of strains displayed on

391

392



393 Interestingly, we found that the presence of a host CRISPR-Cas system (i.e. either  
394 subtypes I-E or I-F), significantly associates with higher virulence (Figure 6A, t-test,  $p = 0.045$ ).  
395 To investigate if this association is related to the immune function of CRISPR-Cas systems, we  
396 considered the status of activity of the host CRISPR-Cas systems. Notably, the presence of active  
397 CRISPR-Cas systems (by the criterion of absence of anti-CRISPR genes) also statistically  
398 correlates with increased virulence (Figure 6B, one-sided t-test,  $p = p = 0.018$ ). Moreover, upon  
399 inclusion of strains with spacer self-targeting to the ‘inactive’ strain set, the statistical correlation  
400 between active CRISPR-Cas and higher virulence is maintained (one-sided t-test,  $p = 0.038$ )

401 The association of active CRISPR-Cas systems with high virulence, suggested a positive  
402 role for this immune system in the maintenance of virulence. Thus, we explored if CRISPR-Cas  
403 could have a direct role in virulence or not. First, we constructed a deletion of the entire six Cas  
404 genes of strain PA14 (strain PA14 $\Delta$ Cas) to abolish CRISPR-Cas activity, but we observed no  
405 significant difference in virulence between the PA14 $\Delta$ Cas and wildtype PA14 (Figure 6C). In  
406 addition, we tested if the Cas proteins have the ability to modulate virulence when expressed from  
407 a plasmid in strain PAO1 that lacks CRISPR-Cas. The PAO1 strain expressing CRISPR/Cas from  
408 a plasmid, (strain PAO1 p(Cas<sup>+</sup>), displayed no significant difference in virulence compared to  
409 PAO1 expressing a plasmid control (p(control)) (Figure 6D). In summary, these results indicate  
410 that CRISPR-Cas is neither necessary nor sufficient to directly modulate bacterial virulence, at  
411 least under the assayed laboratory conditions.

412 We next proceeded to analyze known and presumed innate immune systems of *P.*  
413 *aeruginosa*: RM systems (Roberts et al., 2015) and the cohort of ten novel defense systems  
414 (Doron et al., 2018), respectively. We identified RM systems based on annotations from the  
415 REBASE database (Roberts et al., 2015) (Supplemental Table 1). One or more predicted RM  
416 systems are present in 96% of the strains (50/52 strains), with an average of 3.8 RM systems per  
417 strain. We observed a weak association between the total number of RM systems and virulence  
418 (Supplemental Figure 4A, spearman rank correlation,  $\rho$ : 0.25) that does not reach significance ( $p$   
419  $= 0.08$ ). Similarly, the relationship between each separate RM system type and virulence shows  
420 weak association for the types I, II, III and no association for type IV RM systems (Supplemental  
421 Figure 4). None of the above-mentioned correlations reached statistical significance (all  $p$ -values  
422  $\geq 0.08$ ).

423 Next, we evaluated the presence of ten novel defense systems (Doron et al., 2018) by  
424 homology of the system’s diagnostic proteins to genes in our strain collection. We identified most  
425 of the novel defense systems (8 out of 10) identified by Doron et al. (2018) in the 52 strains set  
426 (Supplemental Table 1). The lammassu, septu, zorya and hachiman systems were found in a low  
427 number of strains (2-8% frequency). In contrast, the druantia, shedu, wadjet and gabija systems  
428 occurred at higher incidence in *P. aeruginosa* (14-37% frequencies). We found no statistically  
429 significant association with virulence for any of the novel immune systems (Supplemental Figure  
430 4). Similarly, we observed no association between the overall number of novel defense systems  
431 per strain and virulence (spearman rank correlation,  $\rho$ : 0.03,  $p = 0.81$ , Supplemental Figure 5).  
432 These results show that the presence or absence of the recently identified immune systems bears

433 no apparent relationship with strain virulence. Interestingly, we noted that the gabija system of  
434 strain PA14 (genes PA14\_60070 and PA14\_60080) and strain CF18 (genes #2421 and ID  
435

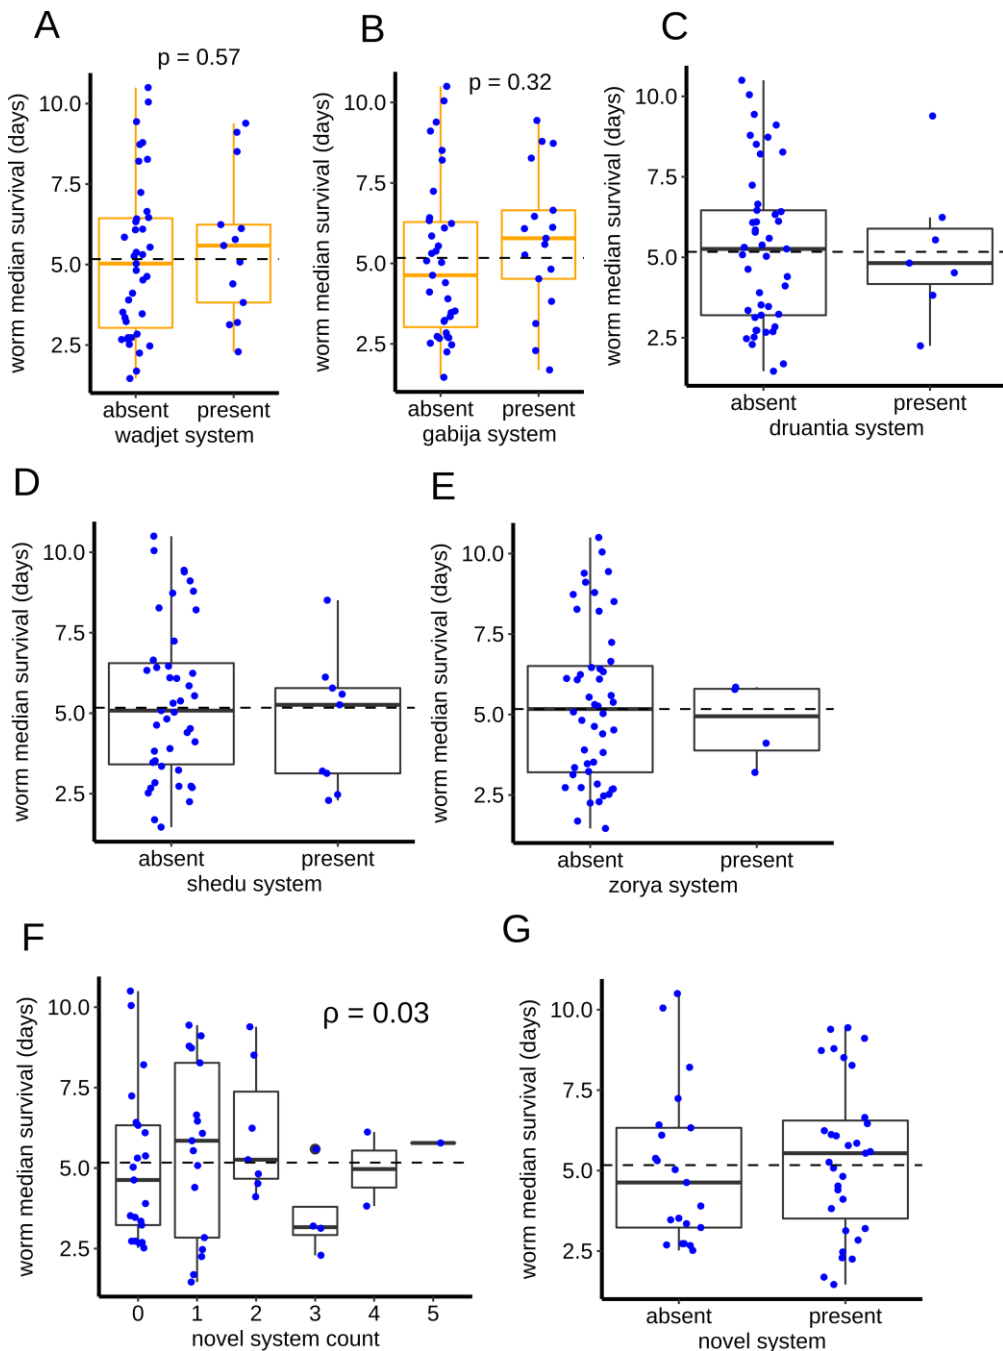

436  
437

### Supplemental Figure 5. Relationship between recently described defense systems and virulence.

(A-E) Box plots of worm median survival in relationship with novel defense system abundance and types. The presence/absence of six novel systems in relationship with median worm survival, displayed separately for wadjet (A), gabija (B), druantia (C), shedu (D) and zorya (E) systems. F) The total number of novel systems per strain is displayed. G) The presence/absence of novel defense systems is displayed. In all graphs, no difference in virulence compared to their complementary strain sets is observed (t-test, all p-values > 0.05). The median virulence of the complete set of strains displayed on each graph is indicated with the dashed horizontal line.

438 #Q002\_01766) are found inside ICEs: PAPI-1 (He et al., 2004) for PA14, and an unnamed ICE  
439 (predicted with ICEfinder (Liu et al., 2019)) for CF18. Altogether, these observations highlight  
440 that ICEs can harbor multiple defense systems, as previously exemplified with type I-C CRISPR-  
441 Cas systems.

442 In summary, we found that RM and novel defense systems, have a weak or no significant  
443 relationship with virulence. In contrast, the presence and activity of CRISPR-Cas systems  
444 associates with higher virulence. The statistical association between active CRISPR-Cas systems  
445 and *P. aeruginosa* virulence suggests that CRISPR-Cas activity may indirectly affect virulence-  
446 related phenotypes, most likely by regulating acquisition and/or retention of accessory genome  
447 virulence factors.

#### 448 449 **Lower virulence correlates with the presence of particular genes targeted by CRISPR** 450 **spacers**

451 To explore the possibility that CRISPR-Cas could indirectly affect the maintenance of  
452 virulence by restricting the uptake of mobile genetic elements, such as phages and ICEs, whose  
453 activities may hypothetically be deleterious to virulence, we utilized the existence of an immunity  
454 record in the CRISPR spacer loci of *P. aeruginosa* strains. CRISPR repeat spacer sequences  
455 identify genes whose restriction by CRISPR-Cas systems of *P. aeruginosa* has been selected for  
456 during the recent evolution of the strains examined. Except in rare cases of apparent spacer ‘self-  
457 targeting’ (Stern et al. 2010; see below), CRISPR spacers and their protospacer target genes are  
458 predominantly found in different genomes.

459 We identified the set of all CRISPR spacers present in 1488 strains and searched for their  
460 targets in the *P. aeruginosa* pangenome. In this manner, we identified 693 genes that are targeted  
461 by spacers (Supplemental Table 6). The vast majority (670 out of 693, corresponding to 97%) of  
462 the identified spacer-targeted genes are not found on the same genomes as the spacers that target  
463 them, and thus reflect genes whose integration into the genome of a given strain was successfully  
464 blocked by CRISPR-Cas during the evolution of that strain. We next determined the relationship  
465 of the spacer-targeted genes with virulence. The distribution of the gene association statistic (p-  
466 value of the LR test) revealed that the set of spacer-targeted genes trends more towards  
467 association with lower virulence when compared to not spacer-targeted genes (Fig 7A, two  
468 sample K-S test, p-value  $7 \times 10^{-12}$ ). However, at the single gene level, the vast majority of the  
469 spacer-targeted genes (683) showed no statistically significant correlation with virulence (Figure  
470 7B-C). Nonetheless, a set of 9 genes was associated with low virulence (Figure 7B, p-value <  
471 0.01 by M-W test). In contrast, only one spacer-targeted gene (cluster #18193) showed significant  
472 association with high virulence. The set of spacer-targeted genes included many genes of  
473 unknown function, although some annotations related them to mobile elements (*i.e.* integrase for  
474 gene #6157, ‘phage capsid’ for gene #8274) as expected.

475 Among the spacer-targeted gene set, we found the *tegI* to *tegN* genes, which form part of a  
476 block of contiguous genes, the ‘*teg* block’. The *teg* gene block likely represents a type of mobile  
477 genetic element. It was examined as part of the broader set of genes associated with low virulence

478 (see section above). From that analysis, it was found that *tegN* could inhibit virulence under  
 479 plasmid expression conditions. Significantly, the ‘*teg* block’ is found predominantly among  
 480 strains with inactive/absent CRISPR-Cas systems (9/10 strains, Fig 7D,  $\chi^2$  test, p-value = 0.038).  
 481 Altogether, these results show that spacer-targeted genes have globally trended towards  
 482 association with lower virulence. Moreover, in some instances (e.g. *tegN* in the *teg* block) the

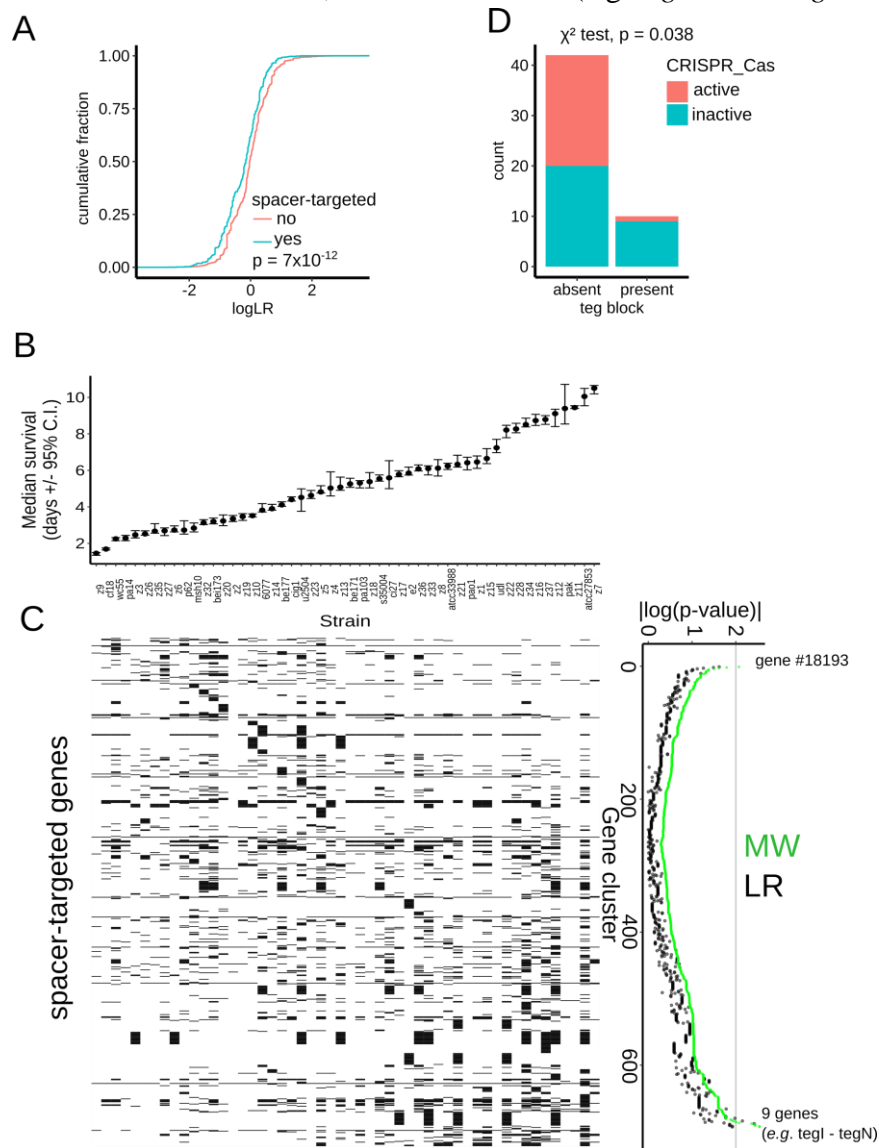

483  
 484

### Figure 7 Association between spacer-targeted genes and bacterial virulence

**A)** Cumulative distributions for the association statistic (log p-value of LR test). Genes in the accessory genome are partitioned according to the targeting by spacers (in cyan color) or not (in red color). The p-value of two sample K-S test is indicated. **(B)** Median survival of adult *C. elegans* worms exposed to the studied collection of *P. aeruginosa* strains. The strains are ordered from high to low virulence (left to right) and aligned with the matrix below. **(C)** Left panel: gene presence/absence matrix for genes targeted by CRISPR spacers. Gene presence is indicated with black squares and absence with white squares. Genes (rows) are aligned with the corresponding p-values. Right panel: Association statistics (p-value of MW and LR tests) for the CRISPR-targeted genes, shown as  $|\log_{10}(pval)|$ . Rows are ordered from association with high virulence to association with low virulence. **(D)** Number of strains (i.e. count) where the *teg* block is present/absent in relationship with the status of the host CRISPR-Cas system (active in red color, inactive in cyan color). The p-value of a Chi square test is indicated.

485  
486 function of these genes can directly impinge on virulence and their genomic presence correlate  
487 with the absence of active CRISPR-Cas systems.

488  
489 **DISCUSSION**

490  
491 In the present study, we investigated bacterial-driven variation in the interactions between  
492 *C. elegans* and *P. aeruginosa*. 52 *P. aeruginosa* wild isolate strains were found to cover a wide  
493 virulence range, spanning from highly virulent strains, which induce a worm median survival of  
494 1.5 days (~11% of their lifespan under standard conditions at 25°C) to strains with almost no  
495 virulence, which induce worm lifetimes similar to those observed with non-pathogenic *E. coli*  
496 HB101, and which do not affect progeny production.

497 Considering that *P. aeruginosa* is a free-living bacterial species that facultatively engages  
498 in pathogenic interactions with invertebrates, and considering that *C. elegans* is a natural bacterial  
499 predator, it is conceivable that the strain variation in virulence towards *C. elegans* reflects  
500 adaptations of *P. aeruginosa* to its natural niches. In natural settings virulence may be a character  
501 under selection by the frequency with which predators are deterred by virulence mechanisms,  
502 and/or by the extent to which the bacterium depends on infection of predator hosts for population  
503 growth.

504 It should be noted that because *P. aeruginosa* is a multi-host pathogen of many species,  
505 including insects and single-celled eukaryotes, as well as nematodes, we cannot say with any  
506 certainty whether any of *P. aeruginosa* strains chosen for this study have undergone selection in  
507 the wild through direct interaction with *C. elegans*. We observed that amongst our 52-strain panel,  
508 environmental strain isolates exhibited on average greater virulence against *C. elegans* than did  
509 clinical isolates (Figure 2B), consistent with previous findings (Sánchez-Diener et al., 2017).  
510 This suggests that some of the strain variation in virulence against *C. elegans* could be influenced  
511 by adaptations of *P. aeruginosa* to its pathogenic association with humans, and that such  
512 adaptations may not necessarily confer pathogenic benefit against *C. elegans*. The virulence of  
513 clinical isolates could reflect genetic and genomic makeup of the bacterium that is favorable in  
514 the context of human immune responses and/or therapeutic antibiotics. Indeed, among the genes  
515 associated with virulence, we observed several genes involved with antibiotic resistance, such as  
516 *mexZ*, a negative regulator of the *mexXY* bacterial efflux pump (Aires et al., 1999; Westbrook-  
517 Wadman et al., 1999) and *arr*, which functions to induce biofilms in response to aminoglycoside  
518 exposure (Hoffman et al., 2005).

519 The variation in virulence among *P. aeruginosa* strains parallels the substantial genomic  
520 diversity of this bacterial species. *P. aeruginosa* strains contain relatively large genomes for a  
521 prokaryote (5-7 Mb; 5000-7000 genes) with a sizable contribution of accessory genome elements  
522 (Figure 1). Our data show that strain variation in *P. aeruginosa* virulence is mediated by specific  
523 accessory genome elements (Figures 3-4), in combination with the core genome, including  
524 previously described *P. aeruginosa* virulence-related factors (Figure 4C). Notably, we find  
525 particular accessory genome elements that contribute to increased virulence, and others that



526 promote decreased virulence (Figure 5). The existence of genes whose functions lead to the  
527 negative regulation of virulence (for example, *qsrO*) are particularly intriguing, and suggest strain  
528 adaptations to niches where capping virulence is advantageous, either for environmental reasons  
529 (e.g. infrequent bacterial predators or hosts for bacteria to feed on) or clinical reasons (e.g.  
530 evasion of immune surveillance at lower virulence).

531 The results of our genetic analysis of HVA and LVA genes indicate a direct role for a  
532 subset of these genes in modulating virulence, whereas for other HVA and LVA genes our  
533 genetic results do not support a direct role. A direct role in virulence for genes PA14\_27700,  
534 PA14\_27680, *pslK*, and *pslM* was expected based on previous findings (Figure 4) and hence their  
535 identification as HVA genes supports our comparative genomics approach. For LVA genes that  
536 we tested genetically, the results suggest a direct contribution for *qsrO* and *tegN* to virulence  
537 (Figure 5). On the other hand, genetic ablation or ectopic expression of *mexZ*, *tegLM*, *ghlO*  
538 (Figure 5, Supplemental Figure 2) or the Cas genes (Figure 7) did not measurably alter virulence.

539 What could account for why certain genes would not exhibit essential virulence functions  
540 in genetic tests, despite being correlated with virulence in gene association analysis? One  
541 possibility could be statistical false discoveries. However, we assessed the reliability of our  
542 statistical analysis with permutation-based testing that allowed us to filter out false discoveries.

543 It is also possible that some of the genes that tested negatively in the genetic tests actually  
544 do function in some contexts as *bona fide* virulence factors, but their effects could be masked by  
545 epistasis in the genomic background of the particular strains in which we conducted our loss-of-  
546 function and gain-of-function tests. The possibility of such strain-specific epistasis could be  
547 investigated by conducting parallel genetic tests for the full cohort of relevant strains.

548 Particularly intriguing is our observation of a positive correlation between the virulence of  
549 *P. aeruginosa* strains against *C. elegans* and the presence of active CRISPR-Cas bacterial  
550 immunity (Figure 6A-B), even though our genetic tests with CRISPR-Cas loss-of-function  
551 mutants or ectopic expression indicate that CRISPR-Cas activity is neither necessary nor  
552 sufficient for increased virulence (Figure 6C-D). This suggests that bacterial adaptive immunity  
553 and anti-predator virulence may be somehow indirectly coupled via the effects of physiological,  
554 ecological, and/or evolutionary factors.

555 Although there are undoubtedly numerous potential underlying causes for a linkage  
556 between CRISPR-Cas and virulence, two broad classes of potential scenarios are suggested  
557 (Figure 8). One scenario is based on possibility that the evolution of accessory genomes is highly  
558 influenced by bacterial restriction systems, such as CRISPR-Cas that function to limit horizontal  
559 gene transfer (HGT) and thereby help shape the makeup of the accessory genome. Our finding  
560 that accessory genome elements can modulate virulence supports the supposition that bacterial  
561 immune systems could indirectly contribute to the maintenance or evolvability of virulence  
562 towards invertebrate predators such as *C. elegans*. This scenario is further supported by our  
563 findings that *P. aeruginosa* genes associated with low virulence include apparent mobile genetic  
564 elements and are more enriched for targeting by CRISPR-Cas spacers that are those associated  
565 with higher virulence (Figure 7).



566  
567

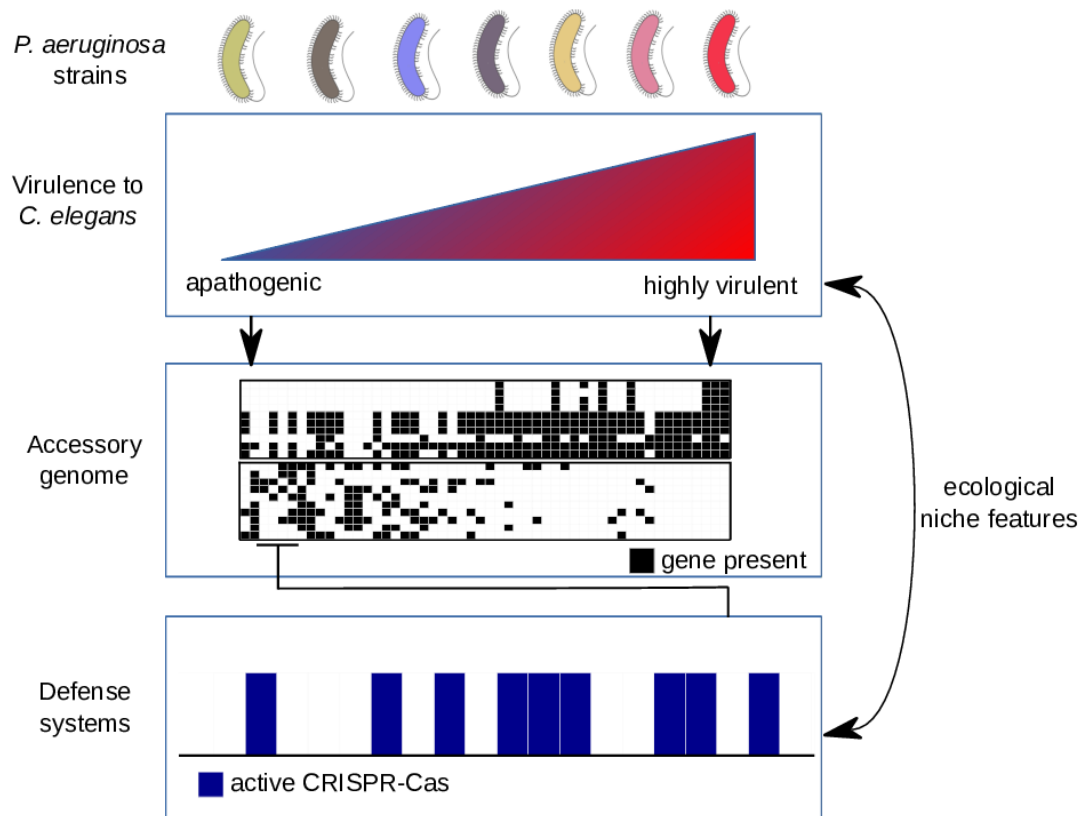

568

### Figure 8 Working Mode for linkage between CRISPR-Cas and virulence.

The strain diversity of *P. aeruginosa* encompasses an ample range of virulence towards adult *C. elegans* worms. Accessory genome elements, represented by a matrix of gene presence/absence (in black/white boxes, respectively), correlate and contribute to the differences in virulence among strains (indicated by arrows). Active defense systems, such as CRISPR-Cas, are enriched in strains with higher virulence. CRISPR spacers target accessory genome elements that are associated with lower virulence (negative arrow). The distribution of active defense systems and higher virulence may also reflect, the co-occurrence of frequent bacterial predators and frequent viral infections in some of the niches inhabited by *P. aeruginosa*.

569

570 A second scenario, not mutually exclusive with the first, is based on the fact that bacterial  
571 restriction systems such as CRISPR-Cas are themselves often part of the accessory genome, as  
572 evidenced in the case of *P. aeruginosa* by the fact that some strains contain one or more CRISPR-  
573 Cas loci, while other strains contain none. Apparently, CRISPR-Cas adaptive immunity is  
574 selected for or against, depending on particular environmental conditions. Therefore, high  
575 virulence and the capacity to restrict HGT could be linked by the co-occurrence of environmental  
576 factors that simultaneously select for both features. For example, in certain *P. aeruginosa* natural  
577 habitats, abundant predation by invertebrates such as *C. elegans* may commonly co-occur with  
578 pressure from an abundance of phages. Conversely, clinical settings may frequently present

579 conditions that simultaneously disfavor high virulence and restriction of HGT. Testing of these  
580 hypotheses will benefit from further studies.

581 Unlike active CRISPR-Cas, we did not observe a similar association of virulence with  
582 other restriction systems, including restriction/modification (RM) and a set of recently identified  
583 restriction systems of less well characterized mechanisms (Doron et al., 2018). These other  
584 systems, particularly the RM systems, differ from CRISPR-Cas fundamentally in that they are not  
585 adaptive immune systems, and hence they would tend to limit uptake of foreign DNA elements  
586 regardless of whether those elements confer positive or negative phenotypes. CRISPR-Cas  
587 systems are much more discriminatory: Restriction of an element by CRISPR-Cas requires  
588 programming the spacer array with a sequence from the targeted element, enabling selection for  
589 targeting of deleterious elements, and selection against targeting of advantageous elements. Thus,  
590 the association that we observe between virulence and active CRISPR-Cas may reflect such  
591 selection for restriction of uptake of elements that are particularly deleterious in the context of  
592 anti-predator virulence.

593 This study shows that genome-wide association (GWAS) analysis of a panel of  
594 genomically diverse strains of a bacterial species can identify previously-unrecognized accessory  
595 genome elements influencing a phenotype of interest, in this case virulence of *P. aeruginosa*  
596 against the invertebrate bacteriovore *C. elegans*. What sorts of genetic bases for virulence  
597 variation might have been missed in our study? First, some of the accessory genome genes that  
598 scored below statistical cutoffs in our study might emerge as high-confidence candidate virulence  
599 modulators from studies of larger and/or more diverse panels of bacterial strains. It should also be  
600 noted that our gene-association analysis scored for presence or absence of intact (accessory  
601 genome) genes. We did not attempt to test for association of virulence with amino acid coding  
602 mutations, or with noncoding sequence polymorphisms that could alter *cis*-regulatory regulation  
603 of direct virulence modulators. Such higher resolution (GWAS) analysis could be the basis for  
604 future inquiries.

605

## 606 MATERIALS AND METHODS

607

### 608 *C. elegans* worm strains.

609 The *C. elegans* N2 strain was used as wild type strain. In addition, strain KU25: *pmk-*  
610 *1(ku25)*, referred to as *pmk-1(lf)*, was used for some virulence assays. All nematode strains were  
611 maintained using standard methods on NGM plates (Brenner, 1974) and fed with *E. coli* HB101.

612

### 613 Bacterial strains.

614 The *P. aeruginosa* strains were routinely grown on LB media at 37°C without antibiotics,  
615 unless otherwise noted. A list of the 52 bacterial isolates established as our experimental panel is  
616 listed in Supplemental Table 1. The description and genotypes of bacterial strains constructed in  
617 the present study are listed in Supplemental Table 5.

618

619 **Worm survival assays (Virulence assays).**

620 Worm survival assays (virulence assays) were performed using slow killing (SK)  
621 conditions (Tan et al., 1999). Briefly, an aliquot of an overnight liquid LB culture of each *P.*  
622 *aeruginosa* strain was plated on SK agar plates. The bacterial lawn was spread to cover the entire  
623 surface of the agar, to prevent worms from easily escaping the bacterial lawn. The plates were  
624 incubated at 37°C for 24h and then at 25°C for 24h, to allow growth of the lawn and the induction  
625 of pathogenic activity (Tan et al., 1999). Prior to use, FUDR (100 ng/μL) was added to the plates  
626 to a final concentration in the agar medium of 300 μM. A synchronous population of young adult  
627 (YA) hermaphrodite N2 worms was prepared by standard hypochlorite treatment, followed by  
628 culture of larvae from L1 stage to YA stage on NGM agar seeded with *E. coli* HB101. The young  
629 adult (YA) worms were then transferred to the SK plates to initiate their exposure to *P.*  
630 *aeruginosa* lawns. The time-course of death of the worms on each plate was determined with the  
631 aid of a “lifespan machine” (Stroustrup et al., 2013), an automated system based on a modified  
632 flatbed scanner. Image analysis was optimized to fit the *P. aeruginosa* slow killing conditions as  
633 described previously (McEwan et al., 2016). The collected survival information was manually  
634 curated and analyzed using R (survminer package) to determine Kaplan-Meier curves and to  
635 estimate median survival and confidence interval. To assess the accuracy of the above semi-  
636 automated method for determination of survival curves, the survival curves generated by the  
637 lifespan machine were compared to manually-obtained survival curves for four strains of varied  
638 virulence and no appreciable difference was observed between lifespans determined automatically  
639 compared to manually (Supplemental Figure 1B). Virulence assays that involved the use of  
640 plasmid-carrying bacterial strains were performed on SK plates supplemented with 20 μM  
641 gentamicin.

642

643 **Generation of mutant and transgenic *P. aeruginosa* strains**

644 *Generation of PA14 strains*

645 A PA14*Δcas* in-frame deletion mutant was constructed using a method described  
646 previously (Djonovic 2013) that employed a sequence that contained regions immediately  
647 flanking the coding sequence of the *cas* genes. This fragment was generated by a standard 3-step  
648 PCR protocol using Phusion DNA polymerase (New England Biolabs) and then cloned into the  
649 *Xba*I and *Hind*III sites of pEX18A (Prentki and Krisch, 1984), resulting in plasmid pEX18-*CIF*.  
650 pEX18-*CIF* was used to introduce the deleted region into the wild-type PA14 genome by  
651 homologous recombination. *Escherichia coli* strain SM10 pir was used for triparental mating. The  
652 deletion of the Cas genes was confirmed by PCR. For the expression of Cas genes in PAO1, the  
653 *P. aeruginosa* PA14 *cas* genes were cloned into the *Hind*III and *Xba*I sites of pUCP19 (West et  
654 al., 1994), creating plasmids pUCP-*cas* (referred to as p(Cas<sup>+</sup>)). The resulting plasmid was  
655 transformed into *P. aeruginosa* PAO1 by electroporation to generate the strain PAO1 p(Cas<sup>+</sup>).

656

657 *Generation of z8 strains*

658 Gene deletions in the z8 strain were obtained using the endogenous type I-F CRISPR-Cas  
659 present in this strain. In brief, the gentamicin selectable plasmid pAB01 was modified to  
660 introduce a spacer targeting the gene of interest and also a homologous recombination (HR)  
661 template with arms flanking the genomic region to be deleted (600-800 bp homology arms). The  
662 corresponding plasmid so obtained is referred to as ‘editing plasmid’. The z8 bacterial cells were  
663 washed twice with 300 mM sucrose and subjected to electroporation (800 ng of editing plasmid, 2  
664 mm gap width cuvettes, 200  $\Omega$ , 25  $\mu$ F, 2500 V using a Gene Pulser XCell machine (Bio-Rad)).  
665 All steps were performed at room temperature. Transformants were selected on LB plates with  
666 gentamicin 50  $\mu$ g/mL. Transformant colonies were re-streaked in LB Gentamicin plates and  
667 genotyped by PCR. After obtaining the desired genomic modification, the editing plasmid was  
668 cured by passage of the strain in liquid LB culture without antibiotic. Plasmid pHERD30T  
669 (gentamicin selectable) was used for the expression of genes associated with virulence, gene(s) of  
670 interest (with surrounding regulatory sequences) were cloned using Gibson assembly.

671

### 672 **Bacterial growth rates**

673 Overnight cultures of each strain (20  $\mu$ l, O.D. = 1.5-2) were inoculated into 180  $\mu$ l of LB  
674 medium in 96 well plates. The optical densities at 650 nm were measured using the SpectraMax  
675 340 microplate reader (Molecular Devices, CA, USA) every 15 minutes for 33 hours. The  
676 experiment was performed at 25°C, the same temperature used for the worm assays, and the plates  
677 were shaken for 5 seconds before the measurements by the plate reader to allow aeration. The  
678 Softmax Pro 6.2.1 (Molecular devices, CA, USA) software was used to analyze the data. Specific  
679 growth rates ( $\mu$ ) were calculated based on the exponential phase of the growth curves. The  $\mu$   
680 values were calculated using the following formula:  $OD = N e^{\mu t}$  where OD is the measured optical  
681 density, N the initial optical density, and  $t$  the time.

682

### 683 **Genomic analysis of *P. aeruginosa* strains**

684 A full list of *P. aeruginosa* species, consisting of 1734 strains, was downloaded from  
685 RefSeq database (Tatusova et al., 2016) (on December 2016). In addition, the corresponding  
686 annotation files that include (1) genomic sequences, (2) nucleotide and (3) protein sequences for  
687 coding genes, and (4) feature tables were downloaded from the RefSeq database as well. Next,  
688 several filtration steps were applied to remove strains that: (1) had no proper 16S rRNA  
689 annotations (missing sequence, or sequence that is shorter than 1000 nts, or sequence that showed  
690 less than 80% identity to PA14 16S rRNA); (2) contained more than 100 core genes with multiple  
691 members or were missing more than 15% of the core genes. The second filter was applied after  
692 one round of clustering with CD-HIT (Fu et al., 2012) and identification of core genes (see details  
693 below). This process resulted in a final set of 1488 strains (Supplemental Table 7).

694

### 695 **Clustering analysis of *P. aeruginosa* coding sequences**

696 The protein sequences of 1488 strains (obtained from the RefSeq database  
697 <ftp://ftp.ncbi.nlm.nih.gov/genomes/all/GCF/>) were clustered using CD-HIT (v4.6.5), with the

698 following settings -c 0.70 -n 5 -g 1 -p 1. The procedure yielded 23,793 clusters of homologous  
699 genes. The output of the clustering analysis was post-processed to generate a statistical report that  
700 lists for each cluster (*i.e.* each homologous gene) the representative sequence, its function, the  
701 total number of occurrences of the gene across the full set of 1,488 strains, and the number of  
702 strains that contain at least one copy of the gene. A presence/absence matrix for each gene across  
703 1488 strains was generated. In addition to the full matrix, a presence/absence matrix for the  
704 collection of 52 experimentally studied strains was extracted. Gene clusters that had no  
705 representatives in these 52 strains were removed, resulting in a matrix with 11,731 genes  
706 (Supplemental Table 8).

707

### 708 **Phylogenetic analysis**

709 Core-genes across the 1488 strains were defined as genes present in more than 90% of the  
710 strains in a single copy only (resulted in 3494 core-genes). For each cluster representing a core  
711 gene the following steps were applied: the corresponding DNA sequences were aligned using  
712 MAFFT default parameters (version 7.273) (Katoh and Standley, 2013); gblocks (ver 0.91b)  
713 (Castresana, 2000) was applied on the alignment to remove poorly aligned positions (with  
714 parameters -t=d -b5=a); an in-house code was used to remove all the invariant positions  
715 (excluding gaps); the alignments were padded with gaps for strains in which the core gene was  
716 missing. All the alignments were then concatenated to a final alignment of 523,361 nucleotides.  
717 The program FastTree (Price et al., 2010), version 2.1, with settings: -gtr, was then used to  
718 generate the phylogenetic tree of the 1,488 strains. The interactive Tree of Life web-based tool  
719 (Letunic and Bork, 2016) was used for visualization of the resulting phylogenetic tree.  
720 Information about MLST, source (clinical/environmental) and strains that are part of the  
721 experimental collection was incorporated into the tree view.

722

### 723 **Statistical test for association of genetic elements (coding/non-coding genes) with virulence**

724 The Mann-Whitney (MW) ranking test and linear-regression (LR) analysis were applied to  
725 every gene to test the association of the presence/absence pattern with virulence. Genes were  
726 considered associated if both tests yielded a p-value lower than 0.05, and at least one of the tests  
727 yielded a p-value smaller than 0.01. Among the virulence-associated genes, genes with negative  
728 slope (based on linear regression) were associated with low survival/high virulence (referred to as  
729 high-virulence associated or HVA), while genes with positive slope were associated with high  
730 survival/low virulence (referred to as low virulence associated or LVA). All the p-values are  
731 shown in log<sub>10</sub> scale as absolute values. The reliability of the p-values was assessed using a  
732 permutation test as described below.

733

### 734 **Permutation test to assess the reliability of the p-values**

735 10,000 permutations of the virulence values and their assignment to strains were generated  
736 (*i.e.* median worm survival values) and the MW and LR association tests were repeated for each  
737 permutation. Then, for each gene the number of times that it received a better p-value using the



738 shuffled virulence data compared to the original one was recorded, separately for MW and LR.  
739 The reliability score was calculated by dividing the above count by 10,000. The MW and LR p-  
740 values were considered reliable if their reliability score was less than 0.05.

741

## 742 **Collection of known non-coding RNA (ncRNA) in *P. aeruginosa***

743 The collection of ncRNAs (excluding rRNAs and tRNAs) in *P. aeruginosa* was  
744 constructed using two resources: RFAM 12.2 (Nawrocki et al., 2015) and RefSeq annotations  
745 (Tatusova et al., 2016). First, 75 non-coding RNA families were extracted from RFAM, with a  
746 total of 1,363 sequences across *P. aeruginosa* strains. To get the representative sequences (there  
747 could be more than one) for each family, the sequences of each family were clustered using CD-  
748 HIT-est (with 80% identity). This analysis resulted in 115 sequences (representing 75 different  
749 ncRNA families). Second, using RefSeq annotations of the 1,488 strains, 2,549 ncRNA sequences  
750 were extracted. Blasting these sequences against RFAM families followed by clustering analysis  
751 revealed additional 8 families that are missing from RFAM. All together our collection comprised  
752 of 83 ncRNA families, represented by 123 sequences. Finally, the collection of the 123 sequences  
753 was blasted against the 1,488 genomic sequences, and a presence/absence matrix for each of the  
754 sequences in all the strains was generated. Rows that represent sequence members from the same  
755 family were collapsed, resulting in matrix with 83 rows.

756

## 757 **Collection of previously identified virulence genes in *P. aeruginosa***

758 A list of virulence genes, in either PA14 or PAO1, was downloaded from (Bartell et al.,  
759 2017). The list was filtered to contain only genes that were reported to contribute to *P. aeruginosa*  
760 virulence towards *C. elegans*, resulting in 56 genes. Another four genes were added based on the  
761 publication (van Tilburg Bernardes et al., 2017). The homologous gene clusters that contained the  
762 above genes were marked as virulence genes. The full list of 60 virulence genes is found in  
763 Supplemental Table 3.

764

## 765 **Analysis of CRISPR-Cas systems**

### 766 *Identification of CRISPR-Cas systems*

767 The presence of CRISPR-Cas systems in the genomes of our *P. aeruginosa* collection was  
768 determined by identifying the gene clusters that encode for Cas proteins.

### 769 *Identification of anti-CRISPR genes*

770 The most up to date collection of anti-CRISPR genes was downloaded from (Marino et  
771 al., 2018), consisting of 41 sequences (<https://tinyurl.com/anti-CRISPR>). Annotations (*e.g.*  
772 CRISPR-Cas subtype inhibited) for each sequence were maintained. The representative sequences  
773 of the clusters of homologous genes (see CD-HIT clustering above) were blasted against the anti-  
774 CRISPR sequences using blastp (Altschul et al., 1997) and e-value threshold of e-10. A coverage  
775 of more than 35% of the anti-CRISPR sequence, was considered a hit.

### 776 *Defining active/inactive systems*



777 The annotation on the type of CRISPR-Cas system(s) that is inhibited by each anti-  
778 CRISPR protein was used to define CRISPR-Cas activity. The type(s) of CRISPR-Cas systems of  
779 every strain were matched to the type(s) inhibited by the anti-CRISPR genes present in the same  
780 genome. Strains where all present CRISPR-Cas system(s) are inhibited by type-matching anti-  
781 CRISPR proteins were considered inactive.

#### 782 *CRISPR Spacer arrays collection*

783 The collection of CRISPR spacer sequences across all 1,488 strains was generated by  
784 applying the CRISPR Recognition Tool (CRT1.2-CLI.jar) (Bland et al., 2007) on genomic  
785 sequences, with default parameters. Since the tool works only with single fasta records, the  
786 genomic sequences (contigs and scaffolds) of each strain were merged before the application of  
787 the tool, and then the results were mapped back to the original sequences using an in-house code.  
788 A total of 35,340 spacer sequences were identified (some sequences were present more than once  
789 in the collection).

790

#### 791 *Targets of CRISPR spacers in the P. aeruginosa pangenome*

792 The program blastn (Altschul et al., 1997), with default parameters was used to identify  
793 matches for the full spacer collection against the DNA sequences of all protein coding genes. The  
794 homologous gene clusters that contained the targeted genes were marked as CRISPR targets.

795 The above set of targets and spacers was further filtered, and spacers where its target is  
796 located in the same genome were tagged as ‘self-targeting’ spacers.

797 In order to use self-targeting spacers to estimate CRISPR-Cas ‘inactivity’ an additional  
798 criterion was included: the target (protospacer) should be conducive to CRISPR-Cas cutting of the  
799 bacterial DNA, i.e. a full spacer-target alignment with PAM presence should exist. The presence  
800 of a CRISPR-Cas locus and at least one spacer satisfying the above criterion was considered to  
801 indicate an inactive status of that strain’s corresponding CRISPR-Cas locus.

802

#### 803 **Analysis of restriction modification (RM) systems**

804 Sequences of RM systems and their type classification were downloaded from REBASE  
805 (The Restriction Enzyme Database) (Roberts et al., 2015). The representative sequences of the  
806 clusters of homologous genes (see CD-HIT clustering above) were blasted against the RM  
807 sequences using blastp and e-value threshold of  $e^{-10}$ . Several filtration steps were ten applied  
808 before marking a gene cluster as an RM gene. Gene clusters were excluded if: (1) the coverage of  
809 the RM sequence by the representative sequence was less than 35%; (2) if the gene cluster  
810 represents a core gene and (3) the function associated with the gene cluster is not diagnostic to an  
811 RM system (e.g. permease, topoisomerase). 227 gene clusters passed the criteria.

812 Next, the RM genes of every strain, were extracted and re-ordered based on their genomic  
813 location. Using the location of the genes, ‘gene blocks’ were determined as groups of genes  
814 separated by less than 8 intervening genes.

815 For every gene, the best matching RM component from REBASE was used to assign an  
816 RM type (either type I, II, III or IV) and identify the RM component (methylase, nuclease,

817 specificity factor, etc). Every gene with a match to a type IV RM was established as a type IV  
818 system.

819 Next, all other RM systems (types I to III), were defined based on the presence of  
820 methylase genes. A gene singleton (*i.e.* not belonging to any gene block) matching a type II  
821 methylase, was established as type II RM system. RM systems inside gene blocks were assigned  
822 based on the following criteria: (a) 1 or 2 methylases must be present per RM system; (b) all gene  
823 components of a given RM system, congruently match a single type of RM system. To assess the  
824 quality of our RM data, we compared our predictions to REBASE data. Seven strains from our  
825 collection have their genomes annotated in the REBASE website. 4 strains have the exact same  
826 number of RM systems, while the RM count of the 3 remaining strains differ by one RM. No  
827 statistical difference exists between our method and REBASE with regard to the RM count of  
828 strains (chi square test,  $p = 0.18$ ).

829

### 830 **Analysis of novel defense systems**

831 Protein accession numbers belonging to ten novel defense systems were downloaded from  
832 (Doron et al., 2018) and were filtered to keep only *P. aeruginosa* proteins. Each protein sequence  
833 was annotated with system type and specific system component. The protein sequences were then  
834 extracted from RefSeq. The representative sequences of the clusters of homologous genes (see  
835 CD-HIT clustering above) were blasted against the protein sequences using blastp (Altschul et al.,  
836 1997) and an e-value threshold of  $e^{-10}$ . A filtration step was applied before marking a gene cluster  
837 as a defense system gene. Gene clusters were excluded if: (1) the coverage of the defense system  
838 sequence by the representative sequence was less than 35%. Next, the candidate genes for novel  
839 defense systems of every strain, were extracted and re-ordered based on their genomic location.  
840 Using the location of the genes, ‘gene blocks’ were determined as groups of genes separated by  
841 less than 8 intervening genes. All novel defense systems, were defined based on the presence of a  
842 set of 2 or more genes uniformly matching a variant of the novel systems as reported by (Doron et  
843 al., 2018).

844

### 845 **COMPETING INTERESTS**

846 The authors declare that no competing interests exist.

847

### 848 **ACKNOWLEDGEMENTS**

849 We would like to acknowledge members of the Ambros and Mello laboratories for  
850 feedback about this research project. We would also like to thank Deborah McEwan for assistance  
851 with the lifespan machine, Zeynep Mirza for contributing the growth rate measurements, Joseph  
852 Bondy-Denomy for sharing plasmid reagents and Veronica Kos for help with strain requests.  
853 Some of the investigated bacterial strains were obtained from International Health Management  
854 Inc. Regarding *C. elegans*, some strains were provided by the CGC, which is funded by NIH  
855 Office of Research Infrastructure Programs (P40 OD010440).

856

857 **FUNDER INFORMATION** This research was supported by funding from NIH grants  
858 R01GM088365 and R01GM034028 (V.A.), R01AI085581 and P30DK040561 (F.M.A.), and the  
859 Pew Charitable Trusts (A.V.R).

860

## 861 **AUTHOR CONTRIBUTIONS**

862

863 A.V.R, I.V-L, V.A designed the study, performed and analyzed experiments, wrote the  
864 manuscript. Z.C. constructed *P. aeruginosa* strains, Z.C. F.A. reviewed the results and the  
865 manuscript.

866

## 867 **SUPPLEMENTARY TABLE LEGENDS**

868

869 **Supplemental Table 1.** Description and features of the experimentally studied collection of 52 *P.*  
870 *aeruginosa* strains.

871 The 52 strains experimentally studied strains are listed, altogether with all the features derived  
872 from this study.

873

874 **Supplemental Table 2.** Genes significantly associated with virulence. Description of the 79  
875 genes that comprise the HVA and LVA sets.

876

877 **Supplemental Table 3.** Known virulence genes in the interactions between *P. aeruginosa* and *C.*  
878 *elegans* under SK condition

879

## 880 **Supplemental Table 4. Nomenclature for the experimentally studied bacterial genes**

881 A set of genes associated with virulence are termed for the *P. aeruginosa* strains z8 and PAO1.  
882 Genes that constitute a gene block frequently found in multiple tandem copies in various strains  
883 are termed teg(G to N), for 'tandem element gene'. The region encompassing from tegG to tegN is  
884 referred to as 'teg gene block'. The Refseq gene 'NT41\_RS12090' is termed ghIO (glycosyl  
885 hydrolase like ORF) as it exhibits similarity to domain Cdd:cd06549 (E-value: 0.02, CDD  
886 database) . The PAO1 genes: PA2228, vqsM, qsrO, and PA225, constitute a putative operon  
887 (Köhler et al., 2014) that is referred to as 'qsr' operon.

888

## 889 **Supplemental Table 5. Bacterial strains generated in the present study**

890 Strains generated in the present study are described with a strain name (AVPae #) and genotype  
891 (in both full and short formats).

892

893 **Supplemental Table 6.** Gene targeted by CRISPR spacers.

894

895 **Supplemental Table 7.** Description of *in silico* studied set of 1448 *P. aeruginosa* strains

896

897 **Supplemental Table 8** . Gene clustering analysis for the *in silico* studied *P. aeruginosa* strains.  
898 Shown are only gene clusters that contain sequences from the studied 52 strains.

899

900 **REFERENCES**

901

Aires, J.R., Köhler, T., Nikaido, H., and Plésiat, P. (1999). Involvement of an active efflux system in the natural resistance of *Pseudomonas aeruginosa* to aminoglycosides. *Antimicrob. Agents Chemother.* 43, 2624–2628.

Altschul, S.F., Madden, T.L., Schäffer, A.A., Zhang, J., Zhang, Z., Miller, W., and Lipman, D.J. (1997). Gapped BLAST and PSI-BLAST: a new generation of protein database search programs. *Nucleic Acids Res.* 25, 3389–3402.

Bartell, J.A., Blazier, A.S., Yen, P., Thøgersen, J.C., Jelsbak, L., Goldberg, J.B., and Papin, J.A. (2017). Reconstruction of the metabolic network of *Pseudomonas aeruginosa* to interrogate virulence factor synthesis. *Nat. Commun.* 8, 14631.

van Belkum, A., Soriaga, L.B., LaFave, M.C., Akella, S., Veyrieras, J.-B., Barbu, E.M., Shortridge, D., Blanc, B., Hannum, G., Zambardi, G., Miller, K., Enright, M.C., Mugnier, N., Brami, D., Schicklin, S., Felderman, M., Schwartz, A.S., Richardson, T.H., Peterson, T.C., Hubby, B., et al. (2015). Phylogenetic Distribution of CRISPR-Cas Systems in Antibiotic-Resistant *Pseudomonas aeruginosa*. *MBio* 6, e01796-01715.

Bland, C., Ramsey, T.L., Sabree, F., Lowe, M., Brown, K., Kyrpides, N.C., and Hugenholtz, P. (2007). CRISPR recognition tool (CRT): a tool for automatic detection of clustered regularly interspaced palindromic repeats. *BMC Bioinformatics* 8, 209.

Brenner, S. (1974). The genetics of *Caenorhabditis elegans*. *Genetics* 77, 71–94.

Bikard, D., Hatoum-Aslan, A., Mucida, D., Marraffini, L.A. (2012). CRISPR interference can prevent natural transformation and virulence acquisition during *in vivo* bacterial infection. *Cell Host Microbe* 12, 177–186

Castresana, J. (2000). Selection of conserved blocks from multiple alignments for their use in phylogenetic analysis. *Mol. Biol. Evol.* 17, 540–552.

Deredjian, A., Colinson, C., Hien, E., Brothier, E., Youenou, B., Cournoyer, B., Dequiedt, S., Hartmann, A., Jolivet, C., Houot, S., Ranjard, L., Saby, N.P.A., and Nazaret, S. (2014). Low occurrence of *Pseudomonas aeruginosa* in agricultural soils with and without organic amendment. *Front. Cell. Infect. Microbiol.* 4, 53.

Doron, S., Melamed, S., Ofir, G., Leavitt, A., Lopatina, A., Keren, M., Amitai, G., and Sorek, R. (2018). Systematic discovery of antiphage defense systems in the microbial pangenome. *Science* 359 (6379).

Feinbaum, R.L., Urbach, J.M., Liberati, N.T., Djonovic, S., Adonizio, A., Carvunis, A.-R., and Ausubel, F.M. (2012). Genome-wide identification of *Pseudomonas aeruginosa* virulence-related genes using a *Caenorhabditis elegans* infection model. *PLoS Pathog.* 8, e1002813.

Ferris, H. (2010). Contribution of nematodes to the structure and function of the soil food web. *J. Nematol.* 42, 63–67.

Franklin, M.J., Nivens, D.E., Weadge, J.T., and Howell, P.L. (2011). Biosynthesis of the *Pseudomonas aeruginosa* Extracellular Polysaccharides, Alginate, Pel, and Psl. *Front. Microbiol.* 2, 167.

Fu, L., Niu, B., Zhu, Z., Wu, S., and Li, W. (2012). CD-HIT: accelerated for clustering the next-generation sequencing data. *Bioinforma. Oxf. Engl.* 28, 3150–3152.

He, J., Baldini, R.L., Déziel, E., Saucier, M., Zhang, Q., Liberati, N.T., Lee, D., Urbach, J., Goodman, H.M., and Rahme, L.G. (2004). The broad host range pathogen *Pseudomonas aeruginosa* strain PA14 carries two pathogenicity islands harboring plant and animal virulence genes. *Proc. Natl. Acad. Sci. U. S. A.* 101, 2530–2535.

Hoffman, L.R., D'Argenio, D.A., MacCoss, M.J., Zhang, Z., Jones, R.A., and Miller, S.I. (2005). Aminoglycoside antibiotics induce bacterial biofilm formation. *Nature* 436, 1171–1175.

Jousset, A. (2012). Ecological and evolutive implications of bacterial defences against predators. *Environ. Microbiol.* 14, 1830–1843.

Kaszab, E., Szoboszlay, S., Dobolyi, C., Háhn, J., Pék, N., and Kriszt, B. (2011). Antibiotic resistance profiles and virulence markers of *Pseudomonas aeruginosa* strains isolated from composts. *Bioresour. Technol.* 102, 1543–1548.

Katoh, K., and Standley, D.M. (2013). MAFFT multiple sequence alignment software version 7: improvements in performance and usability. *Mol. Biol. Evol.* 30, 772–780.

Kay, E., Humair, B., Dénervaud, V., Riedel, K., Spahr, S., Eberl, L., Valverde, C., and Haas, D. (2006). Two GacA-dependent small RNAs modulate the quorum-sensing response in *Pseudomonas aeruginosa*. *J. Bacteriol.* 188, 6026–6033.

Kidd, T.J., Ritchie, S.R., Ramsay, K.A., Grimwood, K., Bell, S.C., and Rainey, P.B. (2012). *Pseudomonas aeruginosa* exhibits frequent recombination, but only a limited association between genotype and ecological setting. *PloS One* 7, e44199.

Kim, D.H., Feinbaum, R., Alloing, G., Emerson, F.E., Garsin, D.A., Inoue, H., Tanaka-Hino, M., Hisamoto, N., Matsumoto, K., Tan, M.-W., and Ausubel, F.M. (2002). A conserved p38 MAP kinase pathway in *Caenorhabditis elegans* innate immunity. *Science* 297, 623–626.

Köhler, T., Ouertatani-Sakouhi, H., Cosson, P., and van Delden, C. (2014). QsrO a novel regulator of quorum-sensing and virulence in *Pseudomonas aeruginosa*. *PloS One* 9, e87814.

Lee, D.G., Urbach, J.M., Wu, G., Liberati, N.T., Feinbaum, R.L., Miyata, S., Diggins, L.T., He, J., Saucier, M., Déziel, E., Friedman, L., Li, L., Grills, G., Montgomery, K., Kucherlapati, R., Rahme, L.G., and Ausubel, F.M. (2006). Genomic analysis reveals that *Pseudomonas aeruginosa* virulence is combinatorial. *Genome Biol.* 7, R90.

Letunic, I., and Bork, P. (2016). Interactive tree of life (iTOL) v3: an online tool for the display and annotation of phylogenetic and other trees. *Nucleic Acids Res.* 44, W242-245.

Liu, M., Li, X., Xie, Y., Bi, D., Sun, J., Li, J., Tai, C., Deng, Z., and Ou, H.-Y. (2019). ICEberg 2.0: an updated database of bacterial integrative and conjugative elements. *Nucleic Acids Res.* 47, D660–D665.

Mahajan-Miklos, S., Tan, M.W., Rahme, L.G., and Ausubel, F.M. (1999). Molecular mechanisms of bacterial virulence elucidated using a *Pseudomonas aeruginosa*-*Caenorhabditis elegans* pathogenesis model. *Cell* 96, 47–56.

Marino, N.D., Zhang, J.Y., Borges, A.L., Sousa, A.A., Leon, L.M., Rauch, B.J., Walton, R.T., Berry, J.D., Joung, J.K., Kleinstiver, B.P., and Bondy-Denomy, J. (2018). Discovery of widespread type I and type V CRISPR-Cas inhibitors. *Science* 362, 240–242.

Martin, N., Singh, J., and Aballay, A. (2017). Natural Genetic Variation in the *Caenorhabditis elegans* Response to *Pseudomonas aeruginosa*. *G3 Bethesda Md* 7, 1137–1147.

McEwan, D.L., Feinbaum, R.L., Stroustrup, N., Haas, W., Conery, A.L., Anselmo, A., Sadreyev, R., and Ausubel, F.M. (2016). Tribbles ortholog NIPI-3 and bZIP transcription factor CEBP-1 regulate a *Caenorhabditis elegans* intestinal immune surveillance pathway. *BMC Biol.* 14, 105.

Pawluk, A., Davidson, A.R., and Maxwell, K.L. (2017). Anti-CRISPR: discovery, mechanism and function. *Nat. Rev. Microbiol.* 16(1):12-17



Pirnay, J.-P., Matthijs, S., Colak, H., Chablain, P., Bilocq, F., Van Eldere, J., De Vos, D., Zizi, M., Triest, L., and Cornelis, P. (2005). Global *Pseudomonas aeruginosa* biodiversity as reflected in a Belgian river. *Environ. Microbiol.* 7, 969–980.

Pirnay, J.-P., Bilocq, F., Pot, B., Cornelis, P., Zizi, M., Van Eldere, J., Deschaght, P., Vanechoutte, M., Jennes, S., Pitt, T., and De Vos, D. (2009). *Pseudomonas aeruginosa* population structure revisited. *PLoS One* 4, e7740.

Prentki, P., and Krisch, H.M. (1984). In vitro insertional mutagenesis with a selectable DNA fragment. *Gene* 29, 303–313.

Price, M.N., Dehal, P.S., and Arkin, A.P. (2010). FastTree 2--approximately maximum-likelihood trees for large alignments. *PLoS One* 5, e9490.

Pukatzki, S., Kessin, R.H., and Mekalanos, J.J. (2002). The human pathogen *Pseudomonas aeruginosa* utilizes conserved virulence pathways to infect the social amoeba *Dictyostelium discoideum*. *Proc. Natl. Acad. Sci. U. S. A.* 99, 3159–3164.

Rahme, L.G., Stevens, E.J., Wolfort, S.F., Shao, J., Tompkins, R.G., and Ausubel, F.M. (1995). Common virulence factors for bacterial pathogenicity in plants and animals. *Science* 268, 1899–1902.

Rahme, L.G., Tan, M.W., Le, L., Wong, S.M., Tompkins, R.G., Calderwood, S.B., and Ausubel, F.M. (1997). Use of model plant hosts to identify *Pseudomonas aeruginosa* virulence factors. *Proc. Natl. Acad. Sci. U. S. A.* 94, 13245–13250.

Reddy, K.C., Andersen, E.C., Kruglyak, L., and Kim, D.H. (2009). A polymorphism in *npr-1* is a behavioral determinant of pathogen susceptibility in *C. elegans*. *Science* 323, 382–384.

Roberts, R.J., Vincze, T., Posfai, J., and Macelis, D. (2015). REBASE--a database for DNA restriction and modification: enzymes, genes and genomes. *Nucleic Acids Res.* 43, D298-299.

Rocchetta, H.L., Burrows, L.L., and Lam, J.S. (1999). Genetics of O-antigen biosynthesis in *Pseudomonas aeruginosa*. *Microbiol. Mol. Biol. Rev.* MMBR 63, 523–553.

Rutherford, V., Yom, K., Ozer, E.A., Pura, O., Hughes, A., Murphy, K.R., Cudzilo, L., Mitchell, D., and Hauser, A.R. (2018). Environmental reservoirs for *exoS*<sup>+</sup> and *exoU*<sup>+</sup> strains of *Pseudomonas aeruginosa*. *Environ. Microbiol. Rep.* 10, 485–492.

Sánchez-Diener, I., Zamorano, L., López-Causapé, C., Cabot, G., Mulet, X., Peña, C., Del Campo, R., Cantón, R., Doménech-Sánchez, A., Martínez-Martínez, L., Arcos, S.C., Navas, A., and Oliver, A. (2017). Interplay among Resistance Profiles, High-Risk Clones, and Virulence in the *Caenorhabditis elegans* *Pseudomonas aeruginosa* Infection Model. *Antimicrob. Agents Chemother.* *61* (12) e01586-17.

Schulenburg, H., and Félix, M.-A. (2017). The Natural Biotic Environment of *Caenorhabditis elegans*. *Genetics* *206*, 55–86.

Selezska, K., Kazmierczak, M., Müsken, M., Garbe, J., Schobert, M., Häussler, S., Wiehlmann, L., Rohde, C., and Sikorski, J. (2012). *Pseudomonas aeruginosa* population structure revisited under environmental focus: impact of water quality and phage pressure. *Environ. Microbiol.* *14*, 1952–1967.

Stern A., Keren L, Wurtzel O, Amitai G, Sorek R. (2010). Self-targeting by CRISPR: gene regulation or autoimmunity? *Trends Genet.* *26*(8):335-40

Stroustrup, N., Ulmschneider, B.E., Nash, Z.M., López-Moyado, I.F., Apfeld, J., and Fontana, W. (2013). The *Caenorhabditis elegans* Lifespan Machine. *Nat. Methods* *10*, 665–670.

Tan, M.W., Mahajan-Miklos, S., and Ausubel, F.M. (1999). Killing of *Caenorhabditis elegans* by *Pseudomonas aeruginosa* used to model mammalian bacterial pathogenesis. *Proc. Natl. Acad. Sci. U. S. A.* *96*, 715–720.

Tatusova, T., DiCuccio, M., Badretdin, A., Chetvernin, V., Nawrocki, E.P., Zaslavsky, L., Lomsadze, A., Pruitt, K.D., Borodovsky, M., and Ostell, J. (2016). NCBI prokaryotic genome annotation pipeline. *Nucleic Acids Res.* *44*, 6614–6624.

van Tilburg Bernardes, E., Charron-Mazenod, L., Reading, D.J., Reckseidler-Zenteno, S.L., and Lewenza, S. (2017). Exopolysaccharide-Repressing Small Molecules with Antibiofilm and Antivirulence Activity against *Pseudomonas aeruginosa*. *Antimicrob. Agents Chemother.* *61*(5).

Vercoe R.B., Chang J.T., Dy R.L., Taylor C., Gristwood T., Clulow J.S., Richter C, Przybilski R, Pitman A.R., Fineran P.C. (2013). Cytotoxic chromosomal targeting by CRISPR/Cas systems can reshape bacterial genomes and expel or remodel pathogenicity islands. *PLoS Genetics.* *9*(4): e1003454

Weitere, M., Bergfeld, T., Rice, S.A., Matz, C., and Kjelleberg, S. (2005). Grazing resistance of *Pseudomonas aeruginosa* biofilms depends on type of protective mechanism, developmental stage and protozoan feeding mode. *Environ. Microbiol.* *7*, 1593–1601.

West, S.E., Schweizer, H.P., Dall, C., Sample, A.K., and Runyen-Janecky, L.J. (1994). Construction of improved Escherichia-Pseudomonas shuttle vectors derived from pUC18/19 and sequence of the region required for their replication in Pseudomonas aeruginosa. *Gene* 148, 81–86.

Westbrock-Wadman, S., Sherman, D.R., Hickey, M.J., Coulter, S.N., Zhu, Y.Q., Warrenner, P., Nguyen, L.Y., Shavar, R.M., Folger, K.R., and Stover, C.K. (1999). Characterization of a Pseudomonas aeruginosa efflux pump contributing to aminoglycoside impermeability. *Antimicrob. Agents Chemother.* 43, 2975–2983.

Zhang, Y.-F., Han, K., Chandler, C.E., Tjaden, B., Ernst, R.K., and Lory, S. (2017). Probing the sRNA regulatory landscape of P. aeruginosa: post-transcriptional control of determinants of pathogenicity and antibiotic susceptibility. *Mol. Microbiol.* (6):919-937.
